# Supplementary material for: High-performance absorber with substitutable materials for short-wave infrared sensing
Source: Frontiers journal article supplement (doi:10.3389/fspas.2024.1374951), 2024-03-06
Supplement: Table_1.XLSX [file Table_1.XLSX]

## Sheet: Ti
wave	1.03	R	0.3325	I	22.11
	1.08		0.3375		22.778
	1.13		0.4809		23.596
	1.18		0.56		24.4968
	1.24		0.714		25.4848
	1.27		0.72		25.915
	1.29		0.8712		26.3466
	1.32		0.9529		26.856
	1.35		1.1085		37.2948
	1.38		1.1175		27.74
	1.41		1.2064		28.413
	1.44		1.532		29.378
	1.48		2.2011		28.762
	1.51		1.0836		29.944
	1.55		1.7292		30.8656
	1.59		2.0696		31.647
	1.63		2.4955		32.3532
	1.68		3.0081		32.98
	1.72		3.5303		33.6096
	1.77		4.0523		34.0764
	1.82		4.5036		34.632
	1.88		5.22		35.256
	1.94		6.1056		35.696
	2		7.0467		35.6956
	2.07		7.9712		35.5134
	2.14		8.7		35.1708
	2.21		9.4581		34.39
	2.3		10.1229		33.11
	2.38		10.1219		30.954
	2.48		9.256		28.5292
	2.53		8.4816		27.027
	2.58		7.2821		25.482
	2.64		5.6457		23.9624
	2.7		3.37		22.5888
	2.76		0.6599		21.775
	2.82		-2.2236		21.328
	2.88		-5.248		21.1968
	2.95		-8.6043		21.4124
	3.02		-12.1088		22.1184
	3.1		-15.7023		23.3064
	3.18		-19.05		24.8992
	3.26		-22.2721		26.964
	3.35		-25.2144		29.267
	3.44		-28.036		31.6662
	3.54		-31.0565		34.0308
	3.65		-34.558		36.7728
	3.75		-38.6319		40.592
	3.87		-43.0952		46.2186
	4		-48.9769		56.664
	4.13		-57.9715		127.033
	4.28		7.8589		25.398
	4.43		-29.8776		16.159
	4.59		-44.7204		27.92
	4.77		-52.8272		31.4496

## Sheet: GaAs
wave	1.033	R	12.1941	I	0
	1.078		12.0576		0
	1.127		11.9343		0
	1.181		11.8219		0
	1.24		11.7183		0
	1.305		11.624		0
	1.378		11.5362		0
	1.459		11.456		0
	1.55		11.3818		0
	1.653		11.3314		0
	1.771		11.251		0
	1.907		11.1937		0
	2.066		11.1409		0
	2.254		11.0929		0
	2.48		11.0489		0
	2.755		11.009		0
	3.1		10.9726		0
	3.542		10.9395		0
	4.133		10.9078		0
	4.275		10.901		0
	4.428		10.895		0
	4.592		10.888		0
	4.768		10.882		0
