# Supplementary material for: High-performance absorber with substitutable materials for short-wave infrared sensing
Source: Frontiers journal article supplement (doi:10.3389/fspas.2024.1374951), 2024-03-06
Supplement: Table_2.XLSX [file Table_2.XLSX]

## Sheet: S22
W	1.00069		R	0.264881		I	-0.292555
	1.00467			0.255086			-0.302438
	1.00867			0.253469			-0.302474
	1.01271			0.242848			-0.31198
	1.01678			0.232391			-0.320633
	1.02089			0.230417			-0.323832
	1.02502			0.219332			-0.330998
	1.02919			0.207911			-0.337423
	1.0334			0.207814			-0.333966
	1.03764			0.19576			-0.339719
	1.04191			0.183271			-0.345106
	1.04622			0.182654			-0.34613
	1.05057			0.170117			-0.350743
	1.05495			0.157309			-0.355004
	1.05936			0.150575			-0.355298
	1.06382			0.137277			-0.359552
	1.06831			0.143156			-0.357031
	1.07284			0.129778			-0.360717
	1.07741			0.116332			-0.364377
	1.08202			0.109816			-0.365387
	1.08667			0.0967807			-0.369059
	1.09136			0.0837625			-0.372204
	1.09609			0.0795852			-0.373433
	1.10086			0.0675782			-0.375576
	1.10567			0.0556009			-0.376961
	1.11052			0.0533466			-0.37451
	1.11542			0.0414209			-0.375518
	1.12036			0.0296922			-0.375928
	1.12534			0.0314016			-0.37517
	1.13037			0.0191664			-0.374257
	1.13545			0.0250865			-0.371706
	1.14057			0.0122981			-0.369908
	1.14573			-0.000616712			-0.367807
	1.15095			0.000374451			-0.367366
	1.15621			-0.0124061			-0.364429
	1.16152			-0.0251363			-0.361528
	1.16687			-0.0275447			-0.359452
	1.17228			-0.0405253			-0.356305
	1.17774			-0.053191			-0.352937
	1.18325			-0.0576427			-0.35231
	1.18881			-0.0695424			-0.348862
	1.19442			-0.0679725			-0.34537
	1.20009			-0.079937			-0.34178
	1.20581			-0.0913003			-0.337351
	1.21158			-0.0932288			-0.336295
	1.21741			-0.103411			-0.33138
	1.2233			-0.113231			-0.325602
	1.22925			-0.111385			-0.322198
	1.23525			-0.120688			-0.314976
	1.24131			-0.129803			-0.307369
	1.24743			-0.129725			-0.306298
	1.25361			-0.138332			-0.298369
	1.25986			-0.146669			-0.289866
	1.26616			-0.148211			-0.284101
	1.27253			-0.15679			-0.275157
	1.27897			-0.15522			-0.274498
	1.28547			-0.163329			-0.265131
	1.29203			-0.171317			-0.255743
	1.29867			-0.170734			-0.250593
	1.30537			-0.178061			-0.241517
	1.31214			-0.185024			-0.23259
	1.31898			-0.187725			-0.229023
	1.3259			-0.193262			-0.220116
	1.33288			-0.189516			-0.169027
	1.33994			-0.187151			-0.164123
	1.34708			-0.189838			-0.155177
	1.35429			-0.191643			-0.146372
	1.36158			-0.186475			-0.145429
	1.36894			-0.187152			-0.136358
	1.37639			-0.182993			-0.130922
	1.38392			-0.18277			-0.121289
	1.39154			-0.182168			-0.11176
	1.39923			-0.179368			-0.109672
	1.40702			-0.177969			-0.100598
	1.41489			-0.176391			-0.0916742
	1.42285			-0.17268			-0.0855143
	1.43089			-0.171352			-0.0770909
	1.43904			-0.169608			-0.0690243
	1.44727			-0.167158			-0.066143
	1.4556			-0.165737			-0.0573762
	1.46402			-0.159202			-0.0537721
	1.47254			-0.1572			-0.0453292
	1.48117			-0.154759			-0.0375358
	1.48989			-0.148737			-0.0363847
	1.49872			-0.142688			-0.0324344
	1.50765			-0.136106			-0.0291737
	1.51669			-0.129157			-0.0274116
	1.52584			-0.125062			-0.0241117
	1.5351			-0.120537			-0.0212753
	1.54447			-0.114983			-0.0234059
	1.55396			-0.109496			-0.0208311
	1.56357			-0.103668			-0.0184194
	1.57328			-0.0957273			-0.0183545
	1.58313			-0.0901337			-0.0161111
	1.5931			-0.0853588			-0.0186575
	1.6032			-0.080012			-0.0173294
	1.61342			-0.0748628			-0.0164535
	1.62378			-0.0616923			-0.0174679
	1.63427			-0.0577228			-0.0170397
	1.6449			-0.0541297			-0.0168469
	1.65567			-0.0509624			-0.0187096
	1.66657			-0.0483093			-0.019907
	1.67763			-0.0458653			-0.0217016
	1.68883			-0.0403505			-0.025566
	1.70018			-0.0389971			-0.0276602
	1.71168			-0.0380129			-0.0302826
	1.72335			-0.0364579			-0.035789
	1.73517			-0.0351492			-0.03876
	1.74715			-0.0316174			-0.044367
	1.7593			-0.0302296			-0.0472234
	1.77163			-0.029104			-0.0499441
	1.78412			-0.0284135			-0.0534871
	1.79679			-0.0281301			-0.0564069
	1.80965			-0.0280422			-0.0591165
	1.82269			-0.0255058			-0.0627701
	1.83592			-0.0263999			-0.0642044
	1.84934			-0.0277616			-0.0653378
	1.86296			-0.0277996			-0.0665221
	1.87677			-0.0304144			-0.0671352
	1.8908			-0.0334117			-0.0675113
	1.90504			-0.0314457			-0.0710627
	1.9195			-0.0345727			-0.0708587
	1.93417			-0.0373189			-0.0712644
	1.94908			-0.0408358			-0.0710246
	1.96421			-0.0441446			-0.0706311
	1.97958			-0.0430675			-0.0715784
	1.9952			-0.0465308			-0.0705696
	2.01106			-0.0497293			-0.0696271
	2.02718			-0.0506065			-0.0719724
	2.04355			-0.0532895			-0.0712791
	2.0602			-0.0557211			-0.0703555
	2.07712			-0.0556162			-0.071501
	2.09431			-0.0570556			-0.0698086
	2.1118			-0.0582461			-0.0687282
	2.12958			-0.0596398			-0.0668067
	2.14766			-0.060664			-0.0644039
	2.16605			-0.0588626			-0.0627765
	2.18476			-0.0594232			-0.0590689
	2.20379			-0.0600074			-0.0550331
	2.22316			-0.0584136			-0.0524143
	2.24287			-0.0592955			-0.0479917
	2.26294			-0.060138			-0.0435359
	2.28337			-0.0515078			-0.0431483
	2.30417			-0.0517751			-0.0383095
	2.32535			-0.0506892			-0.0337171
	2.3469			-0.0486407			-0.0308398
	2.36888			-0.0471361			-0.0270119
	2.39128			-0.0449184			-0.02717
	2.4141			-0.0422712			-0.0248408
	2.43736			-0.0391024			-0.0227568
	2.46107			-0.0337461			-0.0210388
	2.48525			-0.0302565			-0.0194229
	2.50991			-0.0255913			-0.0189691
	2.53507			-0.0187688			-0.0217307
	2.56073			-0.0133876			-0.0227397
	2.58692			-0.00836765			-0.0239566
	2.61365			-0.00168374			-0.0264221
	2.64094			0.00205465			-0.0273343
	2.6688			0.00434751			-0.0295701
	2.69726			0.00661531			-0.0344788
	2.72633			0.00680312			-0.0362659
	2.75604			-0.0174019			-0.0721992
	2.78639			-0.0223528			-0.0725676
	2.81743			-0.0277574			-0.0717293
	2.84917			-0.0296529			-0.0736677
	2.88162			-0.035318			-0.0694929
	2.91483			-0.0402653			-0.0632628
	2.94881			-0.0429008			-0.0582875
	2.98359			-0.0460444			-0.0502029
	3.01919			-0.0475219			-0.0418234
	3.05566			-0.0461196			-0.0349222
	3.09302			-0.0430789			-0.0258441
	3.13131			-0.0369943			-0.0160986
	3.17056			-0.0295878			-0.00596738
	3.2108			-0.0185928			0.00404691
	3.25208			0.00148203			0.00966118
	3.29443			0.0192048			0.0158887
	3.3379			0.0388372			0.0189456
	3.38254			0.0606848			0.018472
	3.42838			0.0821038			0.016001
	3.47548			0.103142			0.0102629
	3.5239			0.123926			-0.000265014
	3.57368			0.144178			-0.0127244
	3.6249			0.162821			-0.0284979
	3.6776			0.182623			-0.0492101
	3.73185			0.196328			-0.075102
	3.78773			0.206599			-0.10571
	3.84531			0.207164			-0.137217
	3.90466			0.199234			-0.171827
	3.96588			0.193625			-0.194561
	4.02905			0.128237			-0.229452
	4.09426			0.0198034			-0.227545
	4.16162			0.027737			-0.206169
	4.23123			0.15568			-0.15933
	4.30321			0.251279			-0.204693
	4.37768			0.185362			-0.18072
	4.45477			0.251696			-0.125274
	4.53463			0.308308			-0.22505
	4.6174			0.304845			-0.313407
	4.70326			0.289694			-0.371078

## Sheet: S12
1.00069	W		R	0.00124553		I	0.000148172
1.00467				0.00126707			8.42593e-05
1.00867				0.00128462			4.53404e-05
1.01271				0.00130327			-5.30754e-06
1.01678				0.00131849			-7.311e-05
1.02089				0.00133446			-0.000112086
1.02502				0.0013443			-0.000183299
1.02919				0.00135084			-0.0002555
1.0334				0.00136338			-0.000279961
1.03764				0.00136682			-0.000352883
1.04191				0.00137252			-0.000410385
1.04622				0.00137682			-0.00045751
1.05057				0.00137149			-0.000533959
1.05495				0.00137133			-0.000594426
1.05936				0.00136537			-0.000658576
1.06382				0.00136115			-0.000721082
1.06831				0.00135915			-0.000772814
1.07284				0.00133756			-0.000852426
1.07741				0.00133988			-0.000900591
1.08202				0.00132375			-0.000967186
1.08667				0.0013109			-0.00102659
1.09136				0.00128086			-0.00110421
1.09609				0.00125879			-0.00116786
1.10086				0.00123956			-0.00122882
1.10567				0.00120043			-0.00130632
1.11052				0.0011845			-0.00135876
1.11542				0.00115763			-0.00142182
1.12036				0.00111013			-0.00149949
1.12534				0.00111109			-0.00154412
1.13037				0.00105554			-0.00162356
1.13545				0.00100982			-0.00168554
1.14057				0.000977441			-0.00174287
1.14573				0.000910096			-0.0018153
1.15095				0.00090279			-0.00185507
1.15621				0.0008263			-0.00192784
1.16152				0.000749941			-0.00199963
1.16687				0.000714743			-0.0020508
1.17228				0.000628029			-0.00211983
1.17774				0.000586684			-0.00217492
1.18325				0.000515335			-0.00223591
1.18881				0.000417762			-0.00230155
1.19442				0.000395502			-0.00235145
1.20009				0.000290709			-0.00241597
1.20581				0.000214141			-0.0024762
1.21158				0.000122241			-0.00253228
1.21741				3.74098e-07			-0.00258811
1.2233				-8.92485e-05			-0.00264424
1.22925				-0.000195704			-0.00269447
1.23525				-0.000270743			-0.00274569
1.24131				-0.00041448			-0.00278793
1.24743				-0.000509807			-0.00283347
1.25361				-0.000632744			-0.00287655
1.25986				-0.000795552			-0.00290438
1.26616				-0.000898189			-0.00294807
1.27253				-0.00106984			-0.00296389
1.27897				-0.00115716			-0.00300285
1.28547				-0.00127584			-0.00304014
1.29203				-0.00144532			-0.00304474
1.29867				-0.00151753			-0.00308743
1.30537				-0.00171068			-0.00307583
1.31214				-0.0019042			-0.00305795
1.31898				-0.00203529			-0.00307931
1.3259				-0.00224777			-0.00304839
1.33288				-0.00293448			-0.00305551
1.33994				-0.00307195			-0.00307818
1.34708				-0.00331269			-0.00299314
1.35429				-0.00352628			-0.00292984
1.36158				-0.003735			-0.00282752
1.36894				-0.0039782			-0.00267849
1.37639				-0.0041268			-0.00266011
1.38392				-0.00435993			-0.00248991
1.39154				-0.00453814			-0.00237304
1.39923				-0.00469528			-0.00228034
1.40702				-0.00490051			-0.00207941
1.41489				-0.00506857			-0.00195111
1.42285				-0.00522894			-0.00182686
1.43089				-0.00538748			-0.00169886
1.43904				-0.0055586			-0.00150381
1.44727				-0.00589276			-0.0012827
1.4556				-0.00628794			-0.00111984
1.46402				-0.00668168			-0.000879082
1.47254				-0.00708247			-0.000567731
1.48117				-0.00748691			-0.000101549
1.48989				-0.00734218			0.000361498
1.49872				-0.00717445			0.0007844
1.50765				-0.00698858			0.00128744
1.51669				-0.00702441			0.00145247
1.52584				-0.00714838			0.00182387
1.5351				-0.00725453			0.00219675
1.54447				-0.00744324			0.00236634
1.55396				-0.00751012			0.00280377
1.56357				-0.00757157			0.00316856
1.57328				-0.0075963			0.0035972
1.58313				-0.00756437			0.00410276
1.5931				-0.00765461			0.00435479
1.6032				-0.00759585			0.00489406
1.61342				-0.00761142			0.00532974
1.62378				-0.00752849			0.00583754
1.63427				-0.00737863			0.00642315
1.6449				-0.00733593			0.00690751
1.65567				-0.00716456			0.00746515
1.66657				-0.00703258			0.00800456
1.67763				-0.00672203			0.0086339
1.68883				-0.00655819			0.00910037
1.70018				-0.00635551			0.00961158
1.71168				-0.00595192			0.0102081
1.72335				-0.00559752			0.0107356
1.73517				-0.0052523			0.0113122
1.74715				-0.00477309			0.01189
1.7593				-0.00438073			0.0123797
1.77163				-0.00372277			0.0129627
1.78412				-0.00326266			0.0134078
1.79679				-0.00268535			0.0139243
1.80965				-0.00187527			0.0143983
1.82269				-0.00136001			0.014842
1.83592				-0.00049776			0.0152719
1.84934				0.000408827			0.0156574
1.86296				0.00100059			0.0160776
1.87677				0.00199395			0.0163736
1.8908				0.00258042			0.0166808
1.90504				0.00328327			0.0170378
1.9195				0.00435954			0.0173164
1.93417				0.00514056			0.0176556
1.94908				0.00635503			0.0178966
1.96421				0.00749948			0.0182601
1.97958				0.00849232			0.0185787
1.9952				0.00990742			0.0186903
2.01106				0.0112547			0.0188798
2.02718				0.0126892			0.0189124
2.04355				0.0137606			0.0191573
2.0602				0.0154813			0.0189554
2.07712				0.0170882			0.0187692
2.09431				0.0187841			0.0184767
2.1118				0.0203364			0.0182702
2.12958				0.022125			0.0177559
2.14766				0.024193			0.0169354
2.16605				0.0262931			0.0162015
2.18476				0.0284357			0.0153016
2.20379				0.0307489			0.0139796
2.22316				0.0328566			0.013665
2.24287				0.0354178			0.01174
2.26294				0.037989			0.00956374
2.28337				0.0402772			0.00842687
2.30417				0.0428853			0.00565725
2.32535				0.0458185			0.00237862
2.3469				0.0487576			-0.00139049
2.36888				0.0515108			-0.00620921
2.39128				0.0537904			-0.0105271
2.4141				0.0554626			-0.0167924
2.43736				0.0565366			-0.0235619
2.46107				0.0585622			-0.0288311
2.48525				0.0583235			-0.0368504
2.50991				0.0575733			-0.0452087
2.53507				0.0552869			-0.0545941
2.56073				0.0501007			-0.0652424
2.58692				0.0441652			-0.074662
2.61365				0.035354			-0.0835681
2.64094				0.0258177			-0.0911155
2.6688				0.0111293			-0.0971381
2.69726				-0.00316409			-0.100451
2.72633				-0.0192378			-0.0993863
2.75604				-0.029169			-0.0945195
2.78639				-0.0427502			-0.0875842
2.81743				-0.0556736			-0.0768636
2.84917				-0.0637425			-0.0645068
2.88162				-0.0694836			-0.0519842
2.91483				-0.0721016			-0.0382364
2.94881				-0.0716681			-0.0275594
2.98359				-0.0687885			-0.0159576
3.01919				-0.0645295			-0.00634494
3.05566				-0.0588646			-0.000611431
3.09302				-0.0538577			0.00480068
3.13131				-0.0495941			0.00701641
3.17056				-0.0450985			0.0100032
3.2108				-0.0408759			0.0118872
3.25208				-0.0378398			0.0126343
3.29443				-0.0347827			0.0137262
3.3379				-0.0327226			0.0143284
3.38254				-0.0302434			0.0148358
3.42838				-0.0279374			0.0154532
3.47548				-0.0258075			0.0152036
3.5239				-0.0240884			0.0152965
3.57368				-0.022461			0.015773
3.6249				-0.0206251			0.0160587
3.6776				-0.0188134			0.0156744
3.73185				-0.0170598			0.0152296
3.78773				-0.0155717			0.014276
3.84531				-0.0143962			0.0135971
3.90466				-0.0130191			0.0120908
3.96588				-0.0119079			0.0100365
4.02905				-0.0104548			0.003236
4.09426				-0.00594819			-0.00235728
4.16162				-0.00747493			-0.00368881
4.23123				-0.0383565			0.00223714
4.30321				-0.153156			0.08081
4.37768				-0.0219578			0.110567
4.45477				0.0160183			0.0654724
4.53463				0.0115211			0.0484084
4.6174				0.00903488			0.0380074
4.70326				0.010739			0.0342156

## Sheet: Z
1.00069	W	1.00069		R	1.34867	I	-0.934698
1.00467		1.00467			1.30493		-0.935812
1.00867		1.00867			1.30127		-0.932413
1.01271		1.01271			1.2581		-0.930438
1.01678		1.01678			1.21843		-0.926648
1.02089		1.02089			1.20787		-0.929052
1.02502		1.02502			1.17153		-0.920718
1.02919		1.02919			1.13714		-0.910406
1.0334		1.0334			1.14367		-0.903721
1.03764		1.03764			1.11028		-0.891405
1.04191		1.04191			1.07781		-0.877973
1.04622		1.04622			1.07485		-0.878658
1.05057		1.05057			1.04473		-0.864191
1.05495		1.05495			1.01563		-0.849135
1.05936		1.05936			1.00393		-0.838206
1.06382		1.06382			0.975168		-0.823179
1.06831		1.06831			0.988835		-0.828713
1.07284		1.07284			0.961276		-0.812973
1.07741		1.07741			0.934388		-0.797638
1.08202		1.08202			0.922777		-0.789227
1.08667		1.08667			0.897498		-0.775326
1.09136		1.09136			0.873642		-0.761132
1.09609		1.09609			0.8658		-0.756997
1.10086		1.10086			0.845524		-0.743369
1.10567		1.10567			0.826708		-0.729138
1.11052		1.11052			0.826792		-0.722704
1.11542		1.11542			0.808831		-0.708598
1.12036		1.12036			0.792187		-0.694348
1.12534		1.12534			0.795469		-0.695443
1.13037		1.13037			0.77993		-0.679167
1.13545		1.13545			0.791096		-0.682891
1.14057		1.14057			0.775823		-0.665069
1.14573		1.14573			0.760849		-0.647251
1.15095		1.15095			0.762682		-0.647791
1.15621		1.15621			0.748883		-0.629531
1.16152		1.16152			0.735156		-0.611924
1.16687		1.16687			0.734174		-0.60664
1.17228		1.17228			0.720381		-0.589103
1.17774		1.17774			0.707266		-0.572122
1.18325		1.18325			0.702128		-0.566991
1.18881		1.18881			0.690141		-0.551286
1.19442		1.19442			0.695403		-0.548271
1.20009		1.20009			0.683356		-0.532748
1.20581		1.20581			0.672824		-0.517112
1.21158		1.21158			0.671295		-0.514114
1.21741		1.21741			0.662607		-0.499317
1.2233		1.2233			0.654996		-0.484056
1.22925		1.22925			0.66004		-0.481255
1.23525		1.23525			0.65397		-0.464856
1.24131		1.24131			0.648231		-0.448408
1.24743		1.24743			0.64912		-0.447117
1.25361		1.25361			0.644014		-0.430911
1.25986		1.25986			0.639424		-0.414428
1.26616		1.26616			0.641359		-0.406119
1.27253		1.27253			0.636345		-0.389224
1.27897		1.27897			0.63875		-0.389392
1.28547		1.28547			0.634319		-0.372473
1.29203		1.29203			0.62979		-0.355845
1.29867		1.29867			0.633494		-0.349646
1.30537		1.30537			0.629233		-0.334014
1.31214		1.31214			0.625129		-0.318973
1.31898		1.31898			0.623531		-0.31306
1.3259		1.3259			0.620926		-0.299008
1.33288		1.33288			0.648082		-0.234193
1.33994		1.33994			0.653114		-0.228547
1.34708		1.34708			0.652792		-0.21556
1.35429		1.35429			0.653411		-0.203098
1.36158		1.36158			0.660716		-0.203565
1.36894		1.36894			0.662767		-0.190995
1.37639		1.37639			0.670171		-0.184846
1.38392		1.38392			0.673348		-0.171605
1.39154		1.39154			0.676818		-0.158532
1.39923		1.39923			0.681283		-0.156355
1.40702		1.40702			0.685541		-0.143952
1.41489		1.41489			0.689848		-0.131695
1.42285		1.42285			0.69647		-0.123718
1.43089		1.43089			0.70006		-0.111895
1.43904		1.43904			0.704034		-0.10057
1.44727		1.44727			0.708071		-0.0968035
1.4556		1.4556			0.711498		-0.0842444
1.46402		1.46402			0.721611		-0.0798668
1.47254		1.47254			0.725651		-0.0676014
1.48117		1.48117			0.730122		-0.0562415
1.48989		1.48989			0.739284		-0.0550911
1.49872		1.49872			0.748838		-0.0496393
1.50765		1.50765			0.759229		-0.0451728
1.51669		1.51669			0.770179		-0.0429708
1.52584		1.52584			0.776854		-0.0380771
1.5351		1.5351			0.784206		-0.0338714
1.54447		1.54447			0.792948		-0.037633
1.55396		1.55396			0.801975		-0.0338265
1.56357		1.56357			0.811626		-0.0302278
1.57328		1.57328			0.824751		-0.0305589
1.58313		1.58313			0.834229		-0.0270996
1.5931		1.5931			0.842157		-0.0316585
1.6032		1.6032			0.851348		-0.0296966
1.61342		1.61342			0.860261		-0.0284662
1.62378		1.62378			0.88327		-0.0309761
1.63427		1.63427			0.89036		-0.0304438
1.6449		1.6449			0.896812		-0.0303046
1.65567		1.65567			0.902412		-0.0338573
1.66657		1.66657			0.907144		-0.0362055
1.67763		1.67763			0.911467		-0.0396518
1.68883		1.68883			0.921267		-0.0472031
1.70018		1.70018			0.923568		-0.0511977
1.71168		1.71168			0.925119		-0.0561502
1.72335		1.72335			0.92735		-0.0665378
1.73517		1.73517			0.929383		-0.0722285
1.74715		1.74715			0.935123		-0.0832076
1.7593		1.7593			0.937244		-0.0887807
1.77163		1.77163			0.938873		-0.0940769
1.78412		1.78412			0.939499		-0.10085
1.79679		1.79679			0.939446		-0.106381
1.80965		1.80965			0.939041		-0.111477
1.82269		1.82269			0.942987		-0.118901
1.83592		1.83592			0.940977		-0.121386
1.84934		1.84934			0.938161		-0.123186
1.86296		1.86296			0.937808		-0.125391
1.87677		1.87677			0.932789		-0.1259
1.8908		1.8908			0.927144		-0.12587
1.90504		1.90504			0.9299		-0.132934
1.9195		1.9195			0.92418		-0.131764
1.93417		1.93417			0.919037		-0.131817
1.94908		1.94908			0.912679		-0.130501
1.96421		1.96421			0.906777		-0.128974
1.97958		1.97958			0.908498		-0.13096
1.9952		1.9952			0.902494		-0.128292
2.01106		2.01106			0.89698		-0.125838
2.02718		2.02718			0.894847		-0.129831
2.04355		2.04355			0.890237		-0.12795
2.0602		2.0602			0.886143		-0.125745
2.07712		2.07712			0.886055		-0.127811
2.09431		2.09431			0.883908		-0.124491
2.1118		2.1118			0.882053		-0.122322
2.12958		2.12958			0.880023		-0.118637
2.14766		2.14766			0.878732		-0.114203
2.16605		2.16605			0.882238		-0.111731
2.18476		2.18476			0.881984		-0.105085
2.20379		2.20379			0.881695		-0.0978586
2.22316		2.22316			0.884972		-0.0935235
2.24287		2.24287			0.884118		-0.0855421
2.26294		2.26294			0.883269		-0.0775184
2.28337		2.28337			0.898728		-0.0780948
2.30417		2.30417			0.898881		-0.0693308
2.32535		2.32535			0.901366		-0.0611589
2.3469		2.3469			0.905358		-0.0561511
2.36888		2.36888			0.908441		-0.049298
2.39128		2.39128			0.912444		-0.0497658
2.4141		2.4141			0.917495		-0.0456759
2.43736		2.43736			0.923515		-0.042037
2.46107		2.46107			0.933617		-0.039235
2.48525		2.48525			0.940307		-0.0364029
2.50991		2.50991			0.949187		-0.0358383
2.53507		2.53507			0.962016		-0.0416288
2.56073		2.56073			0.972355		-0.0440042
2.58692		2.58692			0.98205		-0.0468038
2.61365		2.61365			0.994979		-0.0522943
2.64094		2.64094			1.00235		-0.0544405
2.6688		2.6688			1.00679		-0.0590627
2.69726		2.69726			1.01086		-0.0690865
2.72633		2.72633			1.01122		-0.0727001
2.75604		2.75604			0.957079		-0.13802
2.78639		2.78639			0.947788		-0.137848
2.81743		2.81743			0.937828		-0.135387
2.84917		2.84917			0.93358		-0.13885
2.88162		2.88162			0.923804		-0.129922
2.91483		2.91483			0.915772		-0.11737
2.94881		2.94881			0.911754		-0.107632
2.98359		2.98359			0.907343		-0.0921288
3.01919		3.01919			0.905906		-0.0764712
3.05566		3.05566			0.909397		-0.0639598
3.09302		3.09302			0.915967		-0.0475617
3.13131		3.13131			0.927998		-0.0299523
3.17056		3.17056			0.942342		-0.0112282
3.2108		3.2108			0.963415		0.00784743
3.25208		3.25208			1.0028		0.0194002
3.29443		3.29443			1.0387		0.0330233
3.3379		3.3379			1.08012		0.0409604
3.38254		3.38254			1.12852		0.0417664
3.42838		3.42838			1.17838		0.0378279
3.47548		3.47548			1.22985		0.0253262
3.5239		3.5239			1.28303		-0.000932793
3.57368		3.57368			1.33649		-0.0350343
3.6249		3.6249			1.38621		-0.081558
3.6776		3.6776			1.43794		-0.147121
3.73185		3.73185			1.46688		-0.230852
3.78773		3.78773			1.47661		-0.330258
3.84531		3.84531			1.44898		-0.424074
3.90466		3.90466			1.38744		-0.512449
3.96588		3.96588			1.34361		-0.565583
4.02905		4.02905			1.14552		-0.564782
4.09426		4.09426			0.936079		-0.44946
4.16162		4.16162			0.968557		-0.417453
4.23123		4.23123			1.28752		-0.432501
4.30321		4.30321			1.46269		-0.703329
4.37768		4.37768			1.33403		-0.511892
4.45477		4.45477			1.59876		-0.430742
4.53463		4.53463			1.61575		-0.847184
4.6174		4.6174			1.39254		-1.07632
4.70326		4.70326			1.21355		-1.1548

## Sheet: RL
1.00069	W		-8.07571	RL
1.00467			-8.05381
1.00867			-8.07608
1.01271			-8.06022
1.01678			-8.04623
1.02089			-8.01455
1.02502			-8.02261
1.02919			-8.03876
1.0334			-8.10454
1.03764			-8.13239
1.04191			-8.162
1.04622			-8.14831
1.05057			-8.18269
1.05495			-8.21674
1.05936			-8.27078
1.06382			-8.29379
1.06831			-8.29842
1.07284			-8.32804
1.07741			-8.34745
1.08202			-8.36936
1.08667			-8.36925
1.09136			-8.36982
1.09609			-8.36284
1.10086			-8.36767
1.10567			-8.3806
1.11052			-8.44349
1.11542			-8.45486
1.12036			-8.4709
1.12534			-8.48512
1.13037			-8.52523
1.13545			-8.57627
1.14057			-8.63333
1.14573			-8.68759
1.15095			-8.69802
1.15621			-8.76271
1.16152			-8.81622
1.16687			-8.86175
1.17228			-8.90774
1.17774			-8.94852
1.18325			-8.94677
1.18881			-8.97769
1.19442			-9.06926
1.20009			-9.09377
1.20581			-9.13137
1.21158			-9.14403
1.21741			-9.18989
1.2233			-9.25045
1.22925			-9.34726
1.23525			-9.43951
1.24131			-9.53409
1.24743			-9.5606
1.25361			-9.65934
1.25986			-9.76607
1.26616			-9.88515
1.27253			-9.98723
1.27897			-10.0243
1.28547			-10.1336
1.29203			-10.234
1.29867			-10.3646
1.30537			-10.4558
1.31214			-10.5388
1.31898			-10.5704
1.3259			-10.6651
1.33288			-11.9053
1.33994			-12.0788
1.34708			-12.2099
1.35429			-12.3544
1.36158			-12.5241
1.36894			-12.7068
1.37639			-12.9562
1.38392			-13.1771
1.39154			-13.4032
1.39923			-13.5457
1.40702			-13.789
1.41489			-14.0321
1.42285			-14.3026
1.43089			-14.5217
1.43904			-14.7455
1.44727			-14.9057
1.4556			-15.12
1.46402			-15.4919
1.47254			-15.7241
1.48117			-15.9586
1.48989			-16.2992
1.49872			-16.6935
1.50765			-17.1274
1.51669			-17.5863
1.52584			-17.899
1.5351			-18.2444
1.54447			-18.611
1.55396			-19.0576
1.56357			-19.5521
1.57328			-20.2225
1.58313			-20.7657
1.5931			-21.1723
1.6032			-21.7378
1.61342			-22.3098
1.62378			-23.8605
1.63427			-24.4102
1.6449			-24.9298
1.65567			-25.3059
1.66657			-25.6383
1.67763			-25.8929
1.68883			-26.4173
1.70018			-26.4095
1.71168			-26.2672
1.72335			-25.8335
1.73517			-25.626
1.74715			-25.2752
1.7593			-25.0253
1.77163			-24.7606
1.78412			-24.3555
1.79679			-24.0088
1.80965			-23.6844
1.82269			-23.3813
1.83592			-23.1703
1.84934			-22.9759
1.86296			-22.8416
1.87677			-22.6503
1.8908			-22.461
1.90504			-22.1905
1.9195			-22.0647
1.93417			-21.8901
1.94908			-21.7314
1.96421			-21.588
1.97958			-21.5625
1.9952			-21.4599
2.01106			-21.3543
2.02718			-21.112
2.04355			-21.0125
2.0602			-20.9395
2.07712			-20.8589
2.09431			-20.8999
2.1118			-20.9065
2.12958			-20.9582
2.14766			-21.0635
2.16605			-21.3043
2.18476			-21.5365
2.20379			-21.7852
2.22316			-22.1046
2.24287			-22.3514
2.26294			-22.5869
2.28337			-23.4536
2.30417			-23.8213
2.32535			-24.3107
2.3469			-24.7925
2.36888			-25.2996
2.39128			-25.5974
2.4141			-26.1908
2.43736			-26.8891
2.46107			-28.0095
2.48525			-28.885
2.50991			-29.9364
2.53507			-30.8381
2.56073			-31.5719
2.58692			-31.9116
2.61365			-31.5431
2.64094			-31.2414
2.6688			-30.4901
2.69726			-29.092
2.72633			-28.6598
2.75604			-22.5841
2.78639			-22.3915
2.81743			-22.28
2.84917			-22.0023
2.88162			-22.1634
2.91483			-22.5
2.94881			-22.8084
2.98359			-23.3344
3.01919			-23.9712
3.05566			-24.754
3.09302			-25.9796
3.13131			-27.8841
3.17056			-30.4046
3.2108			-34.4121
3.25208			-40.1984
3.29443			-32.0672
3.3379			-27.2879
3.38254			-23.9536
3.42838			-21.5508
3.47548			-19.6885
3.5239			-18.1367
3.57368			-16.7883
3.6249			-15.6347
3.6776			-14.4645
3.73185			-13.5473
3.78773			-12.6875
3.84531			-12.094
3.90466			-11.5978
3.96588			-11.2295
4.02905			-11.6057
4.09426			-12.8259
4.16162			-13.6376
4.23123			-13.0432
4.30321			-9.78644
4.37768			-11.738
4.45477			-11.0213
4.53463			-8.36536
4.6174			-7.18616
4.70326			-6.54388
