# Supplementary material for: High-performance absorber with substitutable materials for short-wave infrared sensing
Source: Frontiers journal article supplement (doi:10.3389/fspas.2024.1374951), 2024-03-06
Supplement: Table_3.XLSX [file Table_3.XLSX]

## Sheet: R
Wavelength(μm)	1	20nm	0.789167	60nm	0.790441	100nm	0.792427	140nm	0.796818	180nm	0.860777
	1.01859		0.764096		0.766595		0.77191		0.783516		0.860282
	1.03719		0.741998		0.746117		0.75387		0.772571		0.860968
	1.05578		0.723051		0.728288		0.7384		0.763935		0.862628
	1.07437		0.70755		0.713581		0.726453		0.757618		0.865128
	1.09296		0.695281		0.702146		0.717466		0.753429		0.868325
	1.11156		0.685941		0.693666		0.710881		0.75106		0.872052
	1.13015		0.679157		0.687555		0.706231		0.750139		0.876236
	1.14874		0.674155		0.683045		0.703034		0.750258		0.880728
	1.16734		0.670593		0.679582		0.700965		0.750994		0.885318
	1.18593		0.668282		0.677572		0.700048		0.752191		0.890088
	1.20452		0.667052		0.677078		0.700266		0.754092		0.894817
	1.22312		0.666871		0.676666		0.700865		0.75642		0.899647
	1.24171		0.667825		0.677989		0.702143		0.759228		0.904414
	1.2603		0.670022		0.680228		0.705236		0.762927		0.909246
	1.27889		0.673534		0.683813		0.708499		0.767115		0.914123
	1.29749		0.67838		0.688412		0.713678		0.772275		0.918991
	1.31608		0.684523		0.694826		0.719137		0.778107		0.923924
	1.33467		0.691884		0.701508		0.726471		0.784565		0.928931
	1.35327		0.700351		0.709927		0.733881		0.791909		0.933966
	1.37186		0.709792		0.719357		0.742643		0.799706		0.938995
	1.39045		0.720071		0.729023		0.752268		0.807921		0.944001
	1.40905		0.731062		0.739468		0.761953		0.81669		0.948959
	1.42764		0.742664		0.750865		0.772352		0.825904		0.953836
	1.44623		0.754803		0.762836		0.783547		0.835384		0.958589
	1.46482		0.76737		0.775055		0.795032		0.845029		0.963177
	1.48342		0.780179		0.787399		0.806539		0.85478		0.967557
	1.50201		0.793034		0.799811		0.818061		0.864567		0.971689
	1.5206		0.805847		0.812202		0.829589		0.874292		0.975537
	1.5392		0.818536		0.82444		0.84102		0.883839		0.979066
	1.55779		0.830839		0.836372		0.852195		0.893091		0.982247
	1.57638		0.842534		0.847842		0.862954		0.901933		0.985056
	1.59497		0.853629		0.858703		0.873152		0.910263		0.987478
	1.61357		0.86396		0.868817		0.882678		0.91799		0.989515
	1.63216		0.873309		0.87806		0.891453		0.925042		0.991177
	1.65075		0.8818		0.886335		0.89943		0.931361		0.992481
	1.66935		0.889315		0.893609		0.906585		0.936921		0.993443
	1.68794		0.895805		0.899956		0.9129		0.941737		0.994079
	1.70653		0.901485		0.905536		0.918353		0.945878		0.994419
	1.72513		0.906205		0.910466		0.922933		0.949433		0.994522
	1.74372		0.910229		0.914666		0.926713		0.952449		0.994432
	1.76231		0.913555		0.917979		0.929896		0.954916		0.994159
	1.7809		0.916303		0.920575		0.932726		0.95688		0.993741
	1.7995		0.918647		0.922958		0.935252		0.958528		0.993261
	1.81809		0.920576		0.925229		0.93729		0.96001		0.992711
	1.83668		0.922351		0.926952		0.938853		0.961254		0.992101
	1.85528		0.923885		0.928329		0.940398		0.962265		0.991532
	1.87387		0.925453		0.93006		0.942129		0.963301		0.990945
	1.89246		0.926938		0.931715		0.943603		0.964365		0.990383
	1.91106		0.928577		0.933012		0.944883		0.965291		0.989906
	1.92965		0.930263		0.934875		0.946621		0.966343		0.989412
	1.94824		0.932142		0.936775		0.948399		0.967511		0.989042
	1.96683		0.93418		0.938464		0.949927		0.968582		0.988674
	1.98543		0.936371		0.94089		0.952019		0.969874		0.988393
	2.00402		0.938813		0.943016		0.954092		0.971164		0.988161
	2.02261		0.941323		0.945447		0.956021		0.97245		0.987962
	2.04121		0.944105		0.948214		0.958544		0.97391		0.987848
	2.0598		0.946914		0.950646		0.960672		0.975207		0.987725
	2.07839		0.949888		0.953751		0.963115		0.97667		0.987703
	2.09698		0.952932		0.956322		0.9656		0.977972		0.987649
	2.11558		0.955943		0.959452		0.967814		0.97931		0.987694
	2.13417		0.959055		0.962134		0.970417		0.980543		0.987703
	2.15276		0.962029		0.965115		0.972452		0.981687		0.987791
	2.17136		0.964966		0.967756		0.974895		0.982763		0.987866
	2.18995		0.96784		0.970496		0.976747		0.983676		0.987972
	2.20854		0.970469		0.972923		0.978872		0.984529		0.988124
	2.22714		0.973024		0.975348		0.980457		0.985185		0.988229
	2.24573		0.975375		0.977412		0.982197		0.985782		0.988457
	2.26432		0.977436		0.979482		0.983439		0.986192		0.988561
	2.28291		0.9794		0.981097		0.984785		0.986531		0.988824
	2.30151		0.981094		0.982775		0.985635		0.98672		0.988971
	2.3201		0.982476		0.983922		0.986605		0.986823		0.989185
	2.33869		0.983775		0.985191		0.987071		0.986842		0.989431
	2.35729		0.984824		0.985911		0.987684		0.986728		0.989537
	2.37588		0.985535		0.986743		0.987825		0.986632		0.989822
	2.39447		0.986192		0.987141		0.988096		0.986337		0.989926
	2.41307		0.986716		0.98752		0.988009		0.986155		0.990047
	2.43166		0.98689		0.987713		0.987952		0.985753		0.990262
	2.45025		0.986974		0.987663		0.987733		0.985444		0.990213
	2.46884		0.987108		0.987714		0.987389		0.985055		0.990312
	2.48744		0.986985		0.987363		0.987077		0.984552		0.990383
	2.50603		0.986625		0.987196		0.986547		0.984222		0.990186
	2.52462		0.986386		0.9868		0.986115		0.983615		0.990216
	2.54322		0.986176		0.986277		0.985515		0.983162		0.990157
	2.56181		0.985667		0.985969		0.984945		0.982703		0.989826
	2.5804		0.985044		0.985262		0.984337		0.981994		0.989776
	2.59899		0.984652		0.98475		0.983656		0.981597		0.989677
	2.61759		0.984292		0.984282		0.983061		0.981004		0.989258
	2.63618		0.983631		0.983441		0.982326		0.980282		0.989131
	2.65477		0.982881		0.982982		0.981702		0.979938		0.989116
	2.67337		0.98242		0.982433		0.981066		0.979291		0.988719
	2.69196		0.982089		0.981564		0.980322		0.978595		0.988492
	2.71055		0.981491		0.981178		0.979814		0.97834		0.988623
	2.72915		0.980718		0.980681		0.979188		0.977758		0.988444
	2.74774		0.980209		0.979839		0.978519		0.977091		0.988126
	2.76633		0.980012		0.979534		0.978175		0.97696		0.988284
	2.78492		0.979716		0.979246		0.977653		0.976587		0.988496
	2.80352		0.979132		0.978503		0.977094		0.975957		0.988298
	2.82211		0.978606		0.978237		0.976957		0.975916		0.988272
	2.8407		0.978488		0.978284		0.976665		0.975904		0.988723
	2.8593		0.978613		0.977813		0.976234		0.975417		0.989003
	2.87789		0.978567		0.977519		0.976306		0.975343		0.988926
	2.89648		0.978295		0.977875		0.97639		0.975733		0.989158
	2.91508		0.97818		0.977954		0.976162		0.975668		0.989809
	2.93367		0.978512		0.977722		0.976364		0.975518		0.990213
	2.95226		0.979113		0.978128		0.976909		0.976068		0.990273
	2.97085		0.979589		0.978871		0.97709		0.976685		0.990621
	2.98945		0.979848		0.979126		0.977352		0.976791		0.991378
	3.00804		0.980204		0.979412		0.978211		0.977161		0.991934
	3.02663		0.980974		0.980408		0.979025		0.978197		0.992091
	3.04523		0.9821		0.981488		0.979509		0.979074		0.992386
	3.06382		0.983233		0.982092		0.980366		0.97951		0.993101
	3.08241		0.984134		0.982855		0.981668		0.980316		0.993783
	3.10101		0.98493		0.984237		0.982722		0.981698		0.994042
	3.1196		0.985938		0.985622		0.983573		0.982878		0.994186
	3.13819		0.987302		0.986562		0.984821		0.983631		0.99467
	3.15678		0.988839		0.987571		0.986323		0.984646		0.995358
	3.17538		0.990228		0.989045		0.987536		0.986159		0.995773
	3.19397		0.991321		0.990535		0.988585		0.987548		0.995848
	3.21256		0.992256		0.991615		0.989882		0.988483		0.995988
	3.23116		0.993275		0.99257		0.991267		0.98943		0.996434
	3.24975		0.994471		0.993753		0.992384		0.990727		0.996921
	3.26834		0.995687		0.994943		0.99333		0.992018		0.997097
	3.28693		0.996659		0.995787		0.994319		0.992904		0.997009
	3.30553		0.997237		0.996373		0.995196		0.993548		0.996991
	3.32412		0.997483		0.996946		0.995787		0.994273		0.997173
	3.34271		0.997578		0.997401		0.996247		0.994992		0.997323
	3.36131		0.99764		0.997487		0.996664		0.995412		0.997178
	3.3799		0.997615		0.997272		0.99675		0.995519		0.996769
	3.39849		0.997322		0.996995		0.996336		0.9955		0.996322
	3.41709		0.996606		0.996569		0.995772		0.995331		0.995927
	3.43568		0.995443		0.995626		0.995353		0.9948		0.995427
	3.45427		0.993941		0.994118		0.994691		0.993911		0.99464
	3.47286		0.992235		0.992485		0.993202		0.992919		0.993571
	3.49146		0.990376		0.991026		0.991085		0.991884		0.99236
	3.51005		0.988299		0.989375		0.98917		0.99046		0.991049
	3.52864		0.985886		0.986907		0.987685		0.988347		0.989503
	3.54724		0.983066		0.983617		0.985763		0.985802		0.987582
	3.56583		0.979875		0.980261		0.982579		0.983401		0.985336
	3.58442		0.976425		0.977456		0.978604		0.981263		0.982953
	3.60302		0.972826		0.974844		0.975144		0.978778		0.98051
	3.62161		0.969112		0.971422		0.972623		0.975291		0.977819
	3.6402		0.965223		0.966729		0.969883		0.970979		0.974588
	3.65879		0.961067		0.96151		0.965556		0.966796		0.970749
	3.67739		0.956599		0.957002		0.959863		0.963427		0.966599
	3.69598		0.951874		0.953569		0.954548		0.960434		0.96256
	3.71457		0.947028		0.950215		0.950878		0.956618		0.958762
	3.73317		0.942202		0.945562		0.948055		0.951316		0.954839
	3.75176		0.937461		0.939323		0.943982		0.945242		0.950213
	3.77035		0.932753		0.932741		0.937629		0.939909		0.944625
	3.78894		0.92795		0.927474		0.930355		0.936129		0.938469
	3.80754		0.922934		0.923996		0.924628		0.933114		0.932583
	3.82613		0.917696		0.921049		0.921441		0.929127		0.927603
	3.84472		0.912371		0.916731		0.919137		0.923142		0.923412
	3.86332		0.907195		0.910247		0.914964		0.915954		0.919145
	3.88191		0.9024		0.902754		0.907851		0.909636		0.913834
	3.9005		0.898094		0.896519		0.899668		0.90578		0.907235
	3.9191		0.894205		0.893088		0.893669		0.904058		0.900213
	3.93769		0.890513		0.891983		0.891542		0.902411		0.89433
	3.95628		0.88679		0.891012		0.891785		0.898748		0.890874
	3.97487		0.882973		0.887958		0.890924		0.892778		0.889974
	3.99347		0.879315		0.882361		0.886552		0.886465		0.890492
	4.01206		0.876437		0.876076		0.879585		0.882734		0.890843
	4.03065		0.875232		0.872259		0.873887		0.883455		0.890319
	4.04925		0.87665		0.873542		0.873612		0.888283		0.890055
	4.06784		0.881422		0.880659		0.880415		0.895213		0.892908
	4.08643		0.8898		0.892319		0.892626		0.902363		0.902131
	4.10503		0.901411		0.906204		0.906787		0.909544		0.919386
	4.12362		0.915269		0.920251		0.9201		0.918345		0.943131
	4.14221		0.929946		0.933327		0.931825		0.930573		0.968297
	4.1608		0.943864		0.944994		0.942692		0.946157		0.987604
	4.1794		0.955616		0.954787		0.953075		0.962065		0.994083
	4.19799		0.964247		0.961713		0.961626		0.973199		0.983792
	4.21658		0.969406		0.964494		0.965618		0.974936		0.957574
	4.23518		0.971353		0.962433		0.962869		0.965885		0.921109
	4.25377		0.970818		0.956302		0.953843		0.949193		0.883215
	4.27236		0.968766		0.948559		0.942294		0.93153		0.853045
	4.29095		0.966126		0.942577		0.933775		0.920169		0.837248
	4.30955		0.963571		0.941178		0.932761		0.919607		0.838093
	4.32814		0.961379		0.945221		0.940066		0.929446		0.853139
	4.34673		0.959417		0.952988		0.952106		0.944547		0.876428
	4.36533		0.957232		0.960744		0.962482		0.957345		0.900631
	4.38392		0.954216		0.96425		0.96504		0.961137		0.919318
	4.40251		0.949803		0.960521		0.956778		0.952826		0.928607
	4.42111		0.943635		0.949063		0.93912		0.933913		0.927734
	4.4397		0.935675		0.932026		0.91703		0.909487		0.918573
	4.45829		0.926227		0.913296		0.896553		0.885828		0.904435
	4.47688		0.915887		0.896936		0.882113		0.867819		0.888697
	4.49548		0.90542		0.885698		0.874862		0.857276		0.873746
	4.51407		0.895617		0.880187		0.87273		0.852769		0.860527
	4.53266		0.887146		0.878947		0.871929		0.850811		0.848709
	4.55126		0.88045		0.879332		0.869005		0.847706		0.837277
	4.56985		0.875685		0.878713		0.862421		0.841184		0.825235
	4.58844		0.872725		0.87551		0.852991		0.831176		0.81214
	4.60704		0.871222		0.869664		0.843154		0.819523		0.798289
	4.62563		0.87069		0.862439		0.83558		0.808911		0.784559
	4.64422		0.870617		0.855732		0.831863		0.801589		0.772017
	4.66281		0.870557		0.851223		0.831883		0.798431		0.761485
	4.68141		0.8702		0.849725		0.834033		0.798694		0.753226
	4.7		0.869413		0.850952		0.836099		0.800475		0.746878

## Sheet: L
Wavelength(μm)	1		380	0.86159	430	0.835499	480	0.834053	530	0.827001	580	0.787397
	1.01859			0.85962		0.826063		0.819475		0.814923		0.780152
	1.03719			0.859011		0.818426		0.806054		0.802493		0.773151
	1.05578			0.859609		0.81237		0.794251		0.789568		0.76586
	1.07437			0.861331		0.807888		0.784045		0.77794		0.758199
	1.09296			0.864032		0.804892		0.77555		0.766617		0.750483
	1.11156			0.867394		0.803179		0.768723		0.756874		0.742862
	1.13015			0.871131		0.802474		0.763332		0.748301		0.735282
	1.14874			0.875283		0.802463		0.759079		0.74026		0.727632
	1.16734			0.879591		0.802878		0.755679		0.733404		0.720112
	1.18593			0.883815		0.80367		0.752878		0.727389		0.7131
	1.20452			0.888306		0.804887		0.750508		0.721717		0.705887
	1.22312			0.892657		0.806268		0.74867		0.716408		0.698329
	1.24171			0.897286		0.808057		0.74747		0.711657		0.691877
	1.2603			0.901923		0.810284		0.746641		0.70758		0.684863
	1.27889			0.906672		0.812919		0.746565		0.704216		0.679214
	1.29749			0.911668		0.816072		0.747084		0.701579		0.673205
	1.31608			0.916683		0.819777		0.748302		0.699667		0.668734
	1.33467			0.921738		0.823815		0.750092		0.698465		0.664236
	1.35327			0.926908		0.828462		0.752642		0.697948		0.660344
	1.37186			0.932144		0.833483		0.755525		0.698077		0.657612
	1.39045			0.93737		0.838751		0.759059		0.698788		0.65499
	1.40905			0.942544		0.844369		0.763061		0.699961		0.652452
	1.42764			0.947646		0.850318		0.767285		0.701415		0.650493
	1.44623			0.952656		0.856472		0.771845		0.703034		0.64912
	1.46482			0.957542		0.862739		0.776787		0.704935		0.648065
	1.48342			0.962271		0.869069		0.781991		0.707378		0.647167
	1.50201			0.966801		0.87542		0.787344		0.71028		0.64641
	1.5206			0.971091		0.881734		0.792793		0.713121		0.64584
	1.5392			0.9751		0.887944		0.798309		0.715886		0.6455
	1.55779			0.978788		0.893976		0.803853		0.719257		0.645417
	1.57638			0.982123		0.899758		0.809372		0.722978		0.645596
	1.59497			0.985087		0.905222		0.814804		0.726249		0.646024
	1.61357			0.987671		0.91031		0.820088		0.729885		0.646664
	1.63216			0.989874		0.914969		0.825166		0.733966		0.647468
	1.65075			0.99169		0.919157		0.829988		0.737358		0.648409
	1.66935			0.993119		0.922853		0.834506		0.741235		0.649541
	1.68794			0.994187		0.926072		0.838677		0.745071		0.651008
	1.70653			0.994924		0.928874		0.84247		0.748289		0.652912
	1.72513			0.995362		0.931327		0.84589		0.752191		0.655073
	1.74372			0.995542		0.933446		0.848999		0.75511		0.65705
	1.76231			0.99551		0.935196		0.851892		0.758552		0.658691
	1.7809			0.99528		0.936614		0.854608		0.761386		0.66055
	1.7995			0.9949		0.937887		0.857073		0.764252		0.663028
	1.81809			0.994445		0.939123		0.859231		0.766981		0.665358
	1.83668			0.993894		0.940196		0.861261		0.769406		0.66696
	1.85528			0.993286		0.941124		0.86341		0.771981		0.668932
	1.87387			0.99271		0.942183		0.865564		0.774179		0.671491
	1.89246			0.992086		0.9433		0.867518		0.776587		0.673145
	1.91106			0.991506		0.944298		0.869592		0.778802		0.674786
	1.92965			0.990981		0.945502		0.871994		0.781045		0.677303
	1.94824			0.990439		0.946816		0.874286		0.783532		0.678752
	1.96683			0.990025		0.948026		0.876656		0.785625		0.680517
	1.98543			0.989583		0.949521		0.87948		0.788556		0.682905
	2.00402			0.989257		0.95096		0.882161		0.790643		0.684075
	2.02261			0.988943		0.95242		0.885024		0.793926		0.686534
	2.04121			0.98869		0.954064		0.888257		0.79642		0.688233
	2.0598			0.988496		0.955485		0.89121		0.799647		0.690139
	2.07839			0.988311		0.957136		0.894606		0.803031		0.69265
	2.09698			0.988215		0.958533		0.897863		0.805963		0.694213
	2.11558			0.988094		0.960028		0.901118		0.810043		0.697259
	2.13417			0.988074		0.961344		0.904577		0.813289		0.698876
	2.15276			0.988017		0.962601		0.907626		0.817074		0.702226
	2.17136			0.988048		0.96375		0.911021		0.821304		0.704099
	2.18995			0.988065		0.964738		0.913836		0.824643		0.707705
	2.20854			0.988115		0.965645		0.916938		0.828896		0.709821
	2.22714			0.98822		0.966353		0.919417		0.832927		0.713677
	2.24573			0.988255		0.966984		0.922098		0.836249		0.715989
	2.26432			0.988467		0.967447		0.924153		0.840457		0.720108
	2.28291			0.988473		0.967789		0.92635		0.844125		0.722554
	2.30151			0.98874		0.968056		0.927896		0.847099		0.726781
	2.3201			0.988795		0.968133		0.929619		0.850839		0.729482
	2.33869			0.988968		0.968264		0.930634		0.854027		0.733458
	2.35729			0.989188		0.968108		0.931892		0.856341		0.736633
	2.37588			0.989159		0.968136		0.932425		0.859269		0.739906
	2.39447			0.989469		0.967834		0.933233		0.861926		0.743721
	2.41307			0.989444		0.967727		0.933414		0.863488		0.746148
	2.43166			0.989469		0.967412		0.933741		0.865353		0.750181
	2.45025			0.989707		0.967089		0.933756		0.867448		0.75238
	2.46884			0.989447		0.966858		0.933565		0.868473		0.755527
	2.48744			0.98951		0.966327		0.933535		0.869184		0.758397
	2.50603			0.989574		0.966082		0.93292		0.870503		0.76005
	2.52462			0.989128		0.965559		0.932734		0.871333		0.763185
	2.54322			0.989168		0.965041		0.932013		0.871207		0.764511
	2.56181			0.989102		0.964707		0.931376		0.871359		0.766159
	2.5804			0.988505		0.963961		0.930838		0.871918		0.768329
	2.59899			0.988487		0.963505		0.92973		0.871669		0.768526
	2.61759			0.988441		0.963		0.929129		0.870724		0.769879
	2.63618			0.987756		0.962141		0.928096		0.870266		0.770792
	2.65477			0.987632		0.961729		0.926908		0.870083		0.770072
	2.67337			0.987775		0.96111		0.92619		0.869034		0.770731
	2.69196			0.987169		0.9602		0.924787		0.867348		0.770473
	2.71055			0.98684		0.959838		0.923616		0.866177		0.768787
	2.72915			0.98721		0.959232		0.92275		0.865398		0.768511
	2.74774			0.986991		0.958292		0.921138		0.863868		0.767314
	2.76633			0.986449		0.957985		0.919984		0.861537		0.764581
	2.78492			0.986774		0.957556		0.919074		0.859567		0.763233
	2.80352			0.987195		0.956621		0.917382		0.858317		0.761422
	2.82211			0.986815		0.956306		0.916224		0.85675		0.757746
	2.8407			0.986709		0.956213		0.915448		0.854192		0.755176
	2.8593			0.987456		0.955444		0.913834		0.85147		0.753081
	2.87789			0.987856		0.954994		0.912636		0.849637		0.748956
	2.89648			0.987577		0.955252		0.91217		0.848363		0.745046
	2.91508			0.987841		0.955003		0.910923		0.846464		0.742689
	2.93367			0.988822		0.954442		0.909679		0.843698		0.739022
	2.95226			0.989313		0.954755		0.909553		0.841163		0.734136
	2.97085			0.989189		0.955313		0.909105		0.839791		0.730964
	2.98945			0.989596		0.955143		0.908032		0.839091		0.7284
	3.00804			0.990682		0.955177		0.908017		0.837849		0.72396
	3.02663			0.991357		0.956186		0.908646		0.835767		0.719563
	3.04523			0.991353		0.957095		0.908411		0.833886		0.717316
	3.06382			0.991654		0.957321		0.908329		0.833307		0.714953
	3.08241			0.992668		0.958013		0.909635		0.833865		0.710808
	3.10101			0.993545		0.959661		0.910985		0.83436		0.707416
	3.1196			0.993698		0.961119		0.911479		0.833999		0.706305
	3.13819			0.993755		0.961916		0.912665		0.833323		0.704946
	3.15678			0.994441		0.963154		0.915206		0.83361		0.70187
	3.17538			0.9954		0.965354		0.917488		0.83547		0.699585
	3.19397			0.995835		0.967493		0.918983		0.838213		0.699774
	3.21256			0.995768		0.968925		0.921303		0.840595		0.700165
	3.23116			0.995936		0.970502		0.924931		0.842112		0.698785
	3.24975			0.996626		0.972981		0.928276		0.843493		0.697551
	3.26834			0.997291		0.975695		0.930741		0.845954		0.698839
	3.28693			0.997403		0.977732		0.933785		0.850011		0.701354
	3.30553			0.997187		0.979434		0.938116		0.854989		0.702399
	3.32412			0.997223		0.98171		0.942376		0.859665		0.702415
	3.34271			0.997608		0.984491		0.945582		0.863374		0.704215
	3.36131			0.997868		0.986871		0.948773		0.866567		0.70841
	3.3799			0.997629		0.988539		0.953058		0.870367		0.712476
	3.39849			0.997079		0.990156		0.957654		0.875555		0.714727
	3.41709			0.996635		0.99221		0.961202		0.881897		0.71686
	3.43568			0.996367		0.994242		0.963954		0.888323		0.721347
	3.45427			0.995937		0.995565		0.967202		0.89379		0.727782
	3.47286			0.995058		0.996264		0.971055		0.898068		0.733509
	3.49146			0.993834		0.996956		0.974224		0.90186		0.737416
	3.51005			0.992554		0.997781		0.976022		0.90618		0.741425
	3.52864			0.991281		0.998156		0.97733		0.91152		0.747775
	3.54724			0.989766		0.997623		0.979101		0.917432		0.755978
	3.56583			0.987779		0.99651		0.980789		0.922819		0.763481
	3.58442			0.985412		0.995441		0.9811		0.926689		0.768975
	3.60302			0.982956		0.994381		0.97988		0.92881		0.773971
	3.62161			0.980515		0.992581		0.978316		0.929806		0.780772
	3.6402			0.977819		0.989541		0.977151		0.930654		0.789524
	3.65879			0.974504		0.985749		0.975487		0.931938		0.797977
	3.67739			0.97055		0.982152		0.971906		0.933376		0.804107
	3.69598			0.966382		0.97896		0.966423		0.933934		0.808366
	3.71457			0.962472		0.975239		0.96059		0.932434		0.812968
	3.73317			0.958826		0.969894		0.955511		0.928276		0.819164
	3.75176			0.954889		0.962992		0.950266		0.921813		0.825646
	3.77035			0.950036		0.955879		0.942852		0.914139		0.829817
	3.78894			0.944207		0.949844		0.932621		0.906423		0.830447
	3.80754			0.938101		0.944674		0.921298		0.899168		0.828814
	3.82613			0.932672		0.938674		0.911202		0.891835		0.827154
	3.84472			0.928318		0.930276		0.902567		0.883052		0.826099
	3.86332			0.924471		0.919709		0.892987		0.871319		0.823755
	3.88191			0.919982		0.909047		0.879823		0.855838		0.817357
	3.9005			0.914072		0.900446		0.863143		0.837033		0.805864
	3.9191			0.907111		0.894108		0.846066		0.816477		0.79096
	3.93769			0.900583		0.887875		0.831914		0.796226		0.775488
	3.95628			0.896161		0.878954		0.82084		0.777863		0.760746
	3.97487			0.89455		0.866399		0.809286		0.761697		0.745128
	3.99347			0.89495		0.852246		0.793054		0.746504		0.725389
	4.01206			0.895633		0.84025		0.771357		0.729981		0.699515
	4.03065			0.895351		0.833123		0.748175		0.709768		0.6688
	4.04925			0.89466		0.830467		0.729499		0.684658		0.637397
	4.06784			0.896192		0.829126		0.718654		0.655524		0.609693
	4.08643			0.903487		0.825867		0.713666		0.625577		0.587621
	4.10503			0.918868		0.820489		0.709106		0.599821		0.570071
	4.12362			0.941454		0.817019		0.701203		0.583847		0.554963
	4.14221			0.966497		0.821861		0.692325		0.582319		0.542399
	4.1608			0.986556		0.839851		0.691114		0.597643		0.536458
	4.1794			0.994162		0.870634		0.707673		0.629201		0.543953
	4.19799			0.98484		0.907697		0.746764		0.673395		0.570576
	4.21658			0.959156		0.940846		0.803513		0.724444		0.61663
	4.23518			0.922882		0.960888		0.864577		0.775722		0.675021
	4.25377			0.885181		0.964011		0.914286		0.821223		0.732964
	4.27236			0.85556		0.953514		0.942195		0.856786		0.776784
	4.29095			0.84079		0.938066		0.947754		0.880765		0.797486
	4.30955			0.84294		0.927458		0.939649		0.894037		0.794377
	4.32814			0.859151		0.928068		0.930524		0.899393		0.775068
	4.34673			0.883048		0.940228		0.930271		0.900554		0.751999
	4.36533			0.907112		0.958573		0.941506		0.901077		0.737266
	4.38392			0.925061		0.974923		0.959318		0.903456		0.738116
	4.40251			0.933431		0.982125		0.974843		0.908607		0.754926
	4.42111			0.931962		0.976984		0.980297		0.915828		0.782167
	4.4397			0.922881		0.961099		0.97272		0.923179		0.811494
	4.45829			0.909553		0.939514		0.954717		0.928135		0.835339
	4.47688			0.895097		0.918101		0.932322		0.928329		0.849459
	4.49548			0.881455		0.901006		0.911533		0.922172		0.85361
	4.51407			0.869144		0.889287		0.895484		0.909229		0.850491
	4.53266			0.857606		0.881133		0.883579		0.890286		0.843771
	4.55126			0.84589		0.873318		0.872673		0.867113		0.836252
	4.56985			0.833313		0.863035		0.859363		0.842031		0.828918
	4.58844			0.819844		0.849232		0.842035		0.81739		0.821075
	4.60704			0.806113		0.832937		0.821641		0.795097		0.811256
	4.62563			0.793107		0.816569		0.80102		0.776286		0.798317
	4.64422			0.781733		0.802693		0.783284		0.761189		0.782163
	4.66281			0.772447		0.792843		0.770221		0.749219		0.763839
	4.68141			0.765095		0.786921		0.76151		0.739209		0.745044
	4.7			0.758998		0.783365		0.755033		0.729754		0.727388

## Sheet: H1
Wavelength(μm)	1	H1_350	0.967226	H1_450	0.899892	H1_550	0.86159	H1_650	0.936793	H1_750	0.998553
	1.01859		0.96938		0.904488		0.85962		0.924492		0.995857
	1.03719		0.97123		0.909182		0.859011		0.912653		0.991704
	1.05578		0.972804		0.913911		0.859609		0.90171		0.986128
	1.07437		0.974454		0.918726		0.861331		0.892043		0.979229
	1.09296		0.975931		0.923701		0.864032		0.883848		0.971185
	1.11156		0.976971		0.928798		0.867394		0.877045		0.962204
	1.13015		0.978005		0.933744		0.871131		0.871602		0.952512
	1.14874		0.978403		0.938382		0.875283		0.867659		0.942493
	1.16734		0.978639		0.943159		0.879591		0.864618		0.932502
	1.18593		0.97836		0.947782		0.883815		0.862455		0.922511
	1.20452		0.977567		0.952063		0.888306		0.861311		0.913104
	1.22312		0.976515		0.956497		0.892657		0.860734		0.904248
	1.24171		0.974991		0.960532		0.897286		0.861031		0.89633
	1.2603		0.972937		0.964625		0.901923		0.862034		0.889216
	1.27889		0.970488		0.96856		0.906672		0.863471		0.883357
	1.29749		0.967728		0.972187		0.911668		0.865738		0.878343
	1.31608		0.964672		0.975825		0.916683		0.868472		0.874385
	1.33467		0.961326		0.979241		0.921738		0.871486		0.871543
	1.35327		0.957721		0.982316		0.926908		0.874915		0.869512
	1.37186		0.953906		0.985139		0.932144		0.878768		0.8682
	1.39045		0.949941		0.987734		0.93737		0.882926		0.867652
	1.40905		0.94589		0.990046		0.942544		0.887296		0.867843
	1.42764		0.941817		0.992029		0.947646		0.891841		0.868682
	1.44623		0.937796		0.99366		0.952656		0.896546		0.870086
	1.46482		0.933915		0.994934		0.957542		0.901397		0.871992
	1.48342		0.930286		0.995851		0.962271		0.90637		0.874355
	1.50201		0.927016		0.996414		0.966801		0.911429		0.877129
	1.5206		0.924139		0.996634		0.971091		0.916531		0.880266
	1.5392		0.921568		0.99653		0.9751		0.921625		0.883713
	1.55779		0.919208		0.996132		0.978788		0.926653		0.887413
	1.57638		0.917204		0.995484		0.982123		0.931567		0.891317
	1.59497		0.915858		0.994631		0.985087		0.936339		0.895384
	1.61357		0.915082		0.993607		0.987671		0.940958		0.89958
	1.63216		0.914412		0.992422		0.989874		0.945397		0.903852
	1.65075		0.914005		0.991091		0.99169		0.949569		0.908098
	1.66935		0.914395		0.989689		0.993119		0.953363		0.912195
	1.68794		0.915049		0.98834		0.994187		0.956766		0.916099
	1.70653		0.915625		0.987072		0.994924		0.959884		0.919887
	1.72513		0.916979		0.985772		0.995362		0.962742		0.923596
	1.74372		0.918517		0.984459		0.995542		0.965188		0.927055
	1.76231		0.919889		0.983371		0.99551		0.96721		0.930129
	1.7809		0.922075		0.982471		0.99528		0.969019		0.933005
	1.7995		0.923943		0.981502		0.9949		0.970574		0.93577
	1.81809		0.926074		0.980712		0.994445		0.971728		0.938149
	1.83668		0.928547		0.98024		0.993894		0.972727		0.940224
	1.85528		0.93055		0.979655		0.993286		0.973582		0.942271
	1.87387		0.933264		0.979265		0.99271		0.974123		0.943975
	1.89246		0.935276		0.979163		0.992086		0.974651		0.945442
	1.91106		0.937925		0.978857		0.991506		0.975036		0.946943
	1.92965		0.939959		0.978922		0.990981		0.975264		0.948079
	1.94824		0.942423		0.978958		0.990439		0.975572		0.949225
	1.96683		0.944392		0.978976		0.990025		0.975673		0.950282
	1.98543		0.946667		0.979315		0.989583		0.97589		0.951114
	2.00402		0.948464		0.979344		0.989257		0.975987		0.952106
	2.02261		0.950588		0.979808		0.988943		0.976135		0.952784
	2.04121		0.952131		0.979932		0.98869		0.976265		0.953673
	2.0598		0.954148		0.98041		0.988496		0.976385		0.954303
	2.07839		0.955411		0.980636		0.988311		0.976545		0.955089
	2.09698		0.957306		0.981102		0.988215		0.976668		0.955698
	2.11558		0.958366		0.981386		0.988094		0.976843		0.956409
	2.13417		0.960013		0.981857		0.988074		0.97699		0.956985
	2.15276		0.961076		0.982146		0.988017		0.977162		0.957653
	2.17136		0.962255		0.982649		0.988048		0.977354		0.958174
	2.18995		0.963514		0.98289		0.988065		0.977509		0.958832
	2.20854		0.964154		0.98344		0.988115		0.977756		0.959283
	2.22714		0.965462		0.983595		0.98822		0.977895		0.959938
	2.24573		0.965959		0.98418		0.988255		0.978185		0.960331
	2.26432		0.966743		0.984269		0.988467		0.97836		0.960979
	2.28291		0.967593		0.984784		0.988473		0.978642		0.961377
	2.30151		0.967685		0.984907		0.98874		0.978918		0.961967
	2.3201		0.968485		0.985181		0.988795		0.97916		0.962462
	2.33869		0.968721		0.985445		0.988968		0.979536		0.962959
	2.35729		0.968628		0.985379		0.989188		0.979811		0.963598
	2.37588		0.96924		0.985722		0.989159		0.980154		0.964051
	2.39447		0.968998		0.9855		0.989469		0.980566		0.964741
	2.41307		0.968733		0.98557		0.989444		0.980843		0.965304
	2.43166		0.969143		0.985551		0.989469		0.981251		0.965912
	2.45025		0.968627		0.985138		0.989707		0.981648		0.966635
	2.46884		0.96815		0.985219		0.989447		0.981879		0.967196
	2.48744		0.96848		0.984806		0.98951		0.982288		0.967909
	2.50603		0.967961		0.984403		0.989574		0.98261		0.968559
	2.52462		0.967255		0.984386		0.989128		0.982721		0.969127
	2.54322		0.967583		0.983759		0.989168		0.98306		0.969803
	2.56181		0.967415		0.983423		0.989102		0.983277		0.970313
	2.5804		0.966569		0.983369		0.988505		0.983205		0.970811
	2.59899		0.966743		0.982708		0.988487		0.983413		0.971336
	2.61759		0.96719		0.98245		0.988441		0.983563		0.971647
	2.63618		0.966596		0.982504		0.987756		0.983304		0.971991
	2.65477		0.966315		0.981951		0.987632		0.983316		0.972322
	2.67337		0.967116		0.981747		0.987775		0.983485		0.972396
	2.69196		0.967386		0.982019		0.987169		0.983152		0.972528
	2.71055		0.966847		0.981719		0.98684		0.982891		0.972693
	2.72915		0.967144		0.981512		0.98721		0.983089		0.972543
	2.74774		0.968195		0.981983		0.986991		0.982929		0.972408
	2.76633		0.968398		0.9821		0.986449		0.982419		0.972444
	2.78492		0.96801		0.981899		0.986774		0.982438		0.972172
	2.80352		0.968531		0.982362		0.987195		0.982633		0.971722
	2.82211		0.96964		0.982963		0.986815		0.982222		0.971567
	2.8407		0.96988		0.982979		0.986709		0.981822		0.971333
	2.8593		0.969471		0.983193		0.987456		0.982085		0.970673
	2.87789		0.969773		0.983998		0.987856		0.982241		0.970138
	2.89648		0.970702		0.98451		0.987577		0.981771		0.96993
	2.91508		0.970933		0.98458		0.987841		0.98153		0.96941
	2.93367		0.970274		0.985048		0.988822		0.981966		0.968524
	2.95226		0.969876		0.985863		0.989313		0.9822		0.967967
	2.97085		0.970151		0.98623		0.989189		0.981804		0.967714
	2.98945		0.970106		0.98627		0.989596		0.981638		0.967048
	3.00804		0.969036		0.986669		0.990682		0.982179		0.966043
	3.02663		0.967594		0.987256		0.991357		0.982623		0.965447
	3.04523		0.96662		0.987387		0.991353		0.982395		0.965214
	3.06382		0.965789		0.9872		0.991654		0.982181		0.964576
	3.08241		0.964178		0.987254		0.992668		0.982671		0.963501
	3.10101		0.961692		0.987436		0.993545		0.983355		0.962767
	3.1196		0.959124		0.987223		0.993698		0.983426		0.962547
	3.13819		0.956911		0.986657		0.993755		0.983132		0.962093
	3.15678		0.954496		0.986199		0.994441		0.983325		0.961038
	3.17538		0.951185		0.985855		0.9954		0.984068		0.96003
	3.19397		0.947141		0.985196		0.995835		0.98457		0.959646
	3.21256		0.943128		0.984137		0.995768		0.984438		0.959441
	3.23116		0.939419		0.983054		0.995936		0.984249		0.958666
	3.24975		0.935414		0.982085		0.996626		0.984651		0.957459
	3.26834		0.930453		0.980874		0.997291		0.985423		0.956634
	3.28693		0.924712		0.979172		0.997403		0.985838		0.956448
	3.30553		0.919		0.977256		0.997187		0.985702		0.956232
	3.32412		0.913741		0.97546		0.997223		0.985585		0.955376
	3.34271		0.908415		0.973589		0.997608		0.986017		0.954208
	3.36131		0.90216		0.971168		0.997868		0.986803		0.953538
	3.3799		0.894815		0.968162		0.997629		0.987322		0.953557
	3.39849		0.887176		0.965066		0.997079		0.987331		0.953599
	3.41709		0.880156		0.962182		0.996635		0.987227		0.953028
	3.43568		0.87377		0.959123		0.996367		0.987517		0.952067
	3.45427		0.867072		0.955274		0.995937		0.988215		0.951509
	3.47286		0.859124		0.950635		0.995058		0.988874		0.951746
	3.49146		0.850018		0.945891		0.993834		0.989118		0.952312
	3.51005		0.840881		0.941569		0.992554		0.989035		0.952447
	3.52864		0.832842		0.937319		0.991281		0.989012		0.951987
	3.54724		0.825943		0.932266		0.989766		0.989294		0.951533
	3.56583		0.819041		0.926054		0.987779		0.989756		0.95178
	3.58442		0.810818		0.919354		0.985412		0.990076		0.952769
	3.60302		0.801016		0.913194		0.982956		0.99006		0.953861
	3.62161		0.790766		0.907814		0.980515		0.989778		0.954414
	3.6402		0.781721		0.902329		0.977819		0.989421		0.954426
	3.65879		0.774685		0.895625		0.974504		0.989106		0.954513
	3.67739		0.768897		0.887574		0.97055		0.988811		0.9553
	3.69598		0.762572		0.879301		0.966382		0.988451		0.956836
	3.71457		0.754296		0.872162		0.962472		0.987953		0.95857
	3.73317		0.744205		0.866416		0.958826		0.987251		0.959863
	3.75176		0.734019		0.860894		0.954889		0.986263		0.960543
	3.77035		0.725868		0.854052		0.950036		0.984934		0.961021
	3.78894		0.72076		0.845452		0.944207		0.98333		0.96193
	3.80754		0.717776		0.836329		0.938101		0.981673		0.963604
	3.82613		0.71462		0.828646		0.932672		0.980207		0.965841
	3.84472		0.709167		0.823445		0.928318		0.978971		0.968084
	3.86332		0.700994		0.819887		0.924471		0.977681		0.96985
	3.88191		0.691867		0.815878		0.919982		0.97587		0.971063
	3.9005		0.684813		0.80981		0.914072		0.973257		0.972082
	3.9191		0.682309		0.802057		0.907111		0.970061		0.973436
	3.93769		0.684721		0.794963		0.900583		0.966987		0.975488
	3.95628		0.689959		0.791275		0.896161		0.964838		0.978229
	3.97487		0.694662		0.792145		0.89455		0.963961		0.981323
	3.99347		0.69631		0.796254		0.89495		0.963969		0.984323
	4.01206		0.695106		0.800822		0.895633		0.963974		0.986926
	4.03065		0.694555		0.803925		0.895351		0.963259		0.989107
	4.04925		0.700275		0.806542		0.89466		0.961974		0.991066
	4.06784		0.717505		0.812787		0.896192		0.961347		0.993005
	4.08643		0.748406		0.827878		0.903487		0.963147		0.994841
	4.10503		0.790402		0.854798		0.918868		0.968582		0.995986
	4.12362		0.83637		0.891527		0.941454		0.977207		0.995324
	4.14221		0.876684		0.930514		0.966497		0.986476		0.991464
	4.1608		0.902341		0.96095		0.986556		0.992321		0.983221
	4.1794		0.907955		0.972915		0.994162		0.990623		0.970186
	4.19799		0.893501		0.961535		0.98484		0.978977		0.953176
	4.21658		0.864186		0.92921		0.959156		0.95798		0.934336
	4.23518		0.828581		0.884931		0.922882		0.931436		0.916799
	4.25377		0.795743		0.841008		0.885181		0.905341		0.903943
	4.27236		0.772385		0.808646		0.85556		0.886012		0.898475
	4.29095		0.761044		0.794203		0.84079		0.878095		0.901637
	4.30955		0.759759		0.797517		0.84294		0.883168		0.912822
	4.32814		0.763225		0.812738		0.859151		0.899426		0.92973
	4.34673		0.764882		0.83106		0.883048		0.922466		0.949024
	4.36533		0.759178		0.84408		0.907112		0.946798		0.967235
	4.38392		0.743241		0.846484		0.925061		0.9675		0.981635
	4.40251		0.717521		0.837182		0.933431		0.981431		0.990791
	4.42111		0.685316		0.818773		0.931962		0.987692		0.994666
	4.4397		0.651489		0.795845		0.922881		0.987313		0.994307
	4.45829		0.620863		0.77296		0.909553		0.982421		0.991282
	4.47688		0.596846		0.753125		0.895097		0.975277		0.987093
	4.49548		0.580664		0.737201		0.881455		0.967545		0.982766
	4.51407		0.571343		0.724252		0.869144		0.959973		0.978718
	4.53266		0.566353		0.712496		0.857606		0.95251		0.974872
	4.55126		0.562602		0.700349		0.84589		0.944699		0.970927
	4.56985		0.557451		0.687135		0.833313		0.936119		0.966631
	4.58844		0.549433		0.673245		0.819844		0.926696		0.961957
	4.60704		0.538514		0.659804		0.806113		0.916775		0.957115
	4.62563		0.525885		0.648071		0.793107		0.906975		0.95244
	4.64422		0.51341		0.638859		0.781733		0.897923		0.948223
	4.66281		0.502952		0.632216		0.772447		0.889997		0.944566
	4.68141		0.495781		0.627453		0.765095		0.883194		0.941331
	4.7		0.492237		0.623452		0.758998		0.877148		0.938199
