# Supplementary material for: High-performance absorber with substitutable materials for short-wave infrared sensing
Source: Frontiers journal article supplement (doi:10.3389/fspas.2024.1374951), 2024-03-06
Supplement: Table_4.XLSX [file Table_4.XLSX]

## Sheet: H2
Wavelength(μm)	1	50	0.938889	80	0.877486	110	0.86159	140	0.882776	170	0.946372
	1.01859		0.942603		0.880453		0.85962		0.873861		0.934461
	1.03719		0.946081		0.884204		0.859011		0.867091		0.921359
	1.05578		0.949192		0.888583		0.859609		0.862341		0.90859
	1.07437		0.951878		0.89352		0.861331		0.859447		0.897232
	1.09296		0.954098		0.898912		0.864032		0.858137		0.887805
	1.11156		0.955744		0.904541		0.867394		0.857988		0.880363
	1.13015		0.956664		0.910234		0.871131		0.858638		0.874751
	1.14874		0.957015		0.9161		0.875283		0.860096		0.870764
	1.16734		0.956931		0.921925		0.879591		0.86206		0.867925
	1.18593		0.956041		0.927477		0.883815		0.864238		0.866028
	1.20452		0.954856		0.933068		0.888306		0.866886		0.86497
	1.22312		0.952998		0.93828		0.892657		0.869499		0.864574
	1.24171		0.950982		0.943459		0.897286		0.872496		0.864991
	1.2603		0.948408		0.948291		0.901923		0.875581		0.866033
	1.27889		0.945785		0.952862		0.906672		0.878834		0.867459
	1.29749		0.943021		0.957212		0.911668		0.882429		0.869362
	1.31608		0.940018		0.961112		0.916683		0.886106		0.871562
	1.33467		0.937086		0.964591		0.921738		0.889871		0.87397
	1.35327		0.934326		0.967689		0.926908		0.893834		0.876623
	1.37186		0.931662		0.970337		0.932144		0.897964		0.879506
	1.39045		0.929082		0.972475		0.93737		0.902191		0.882558
	1.40905		0.926649		0.974094		0.942544		0.906484		0.88574
	1.42764		0.924419		0.975217		0.947646		0.910845		0.889038
	1.44623		0.92242		0.975871		0.952656		0.915284		0.892452
	1.46482		0.920659		0.976088		0.957542		0.919801		0.895986
	1.48342		0.919139		0.975908		0.962271		0.924394		0.89964
	1.50201		0.91786		0.975379		0.966801		0.929052		0.903411
	1.5206		0.916827		0.974557		0.971091		0.933758		0.907292
	1.5392		0.916039		0.9735		0.9751		0.938488		0.911268
	1.55779		0.915487		0.972264		0.978788		0.94321		0.91532
	1.57638		0.915141		0.9709		0.982123		0.947894		0.919432
	1.59497		0.914966		0.969449		0.985087		0.952524		0.923598
	1.61357		0.914956		0.967958		0.987671		0.957095		0.927816
	1.63216		0.915177		0.966496		0.989874		0.961588		0.932071
	1.65075		0.915718		0.965146		0.99169		0.965936		0.93631
	1.66935		0.916544		0.963945		0.993119		0.970049		0.940468
	1.68794		0.917462		0.962849		0.994187		0.973912		0.944545
	1.70653		0.918412		0.961831		0.994924		0.977585		0.948587
	1.72513		0.919636		0.961006		0.995362		0.981036		0.952549
	1.74372		0.921195		0.960456		0.995542		0.984129		0.956316
	1.76231		0.922733		0.960041		0.99551		0.986895		0.959922
	1.7809		0.924276		0.959721		0.99528		0.989435		0.963435
	1.7995		0.9262		0.959695		0.9949		0.99161		0.9667
	1.81809		0.928146		0.959853		0.994445		0.993413		0.969714
	1.83668		0.929983		0.960049		0.993894		0.995003		0.972606
	1.85528		0.932192		0.960528		0.993286		0.996211		0.975163
	1.87387		0.934293		0.961122		0.99271		0.997122		0.977476
	1.89246		0.936373		0.961753		0.992086		0.997842		0.979607
	1.91106		0.938741		0.962649		0.991506		0.998179		0.981321
	1.92965		0.940807		0.963502		0.990981		0.99841		0.982916
	1.94824		0.943154		0.964517		0.990439		0.998343		0.984115
	1.96683		0.945333		0.965595		0.990025		0.998123		0.985096
	1.98543		0.947532		0.966665		0.989583		0.997771		0.985833
	2.00402		0.949775		0.967878		0.989257		0.997198		0.986217
	2.02261		0.951828		0.968995		0.988943		0.996637		0.986513
	2.04121		0.954035		0.970252		0.98869		0.995822		0.986371
	2.0598		0.955958		0.971385		0.988496		0.995115		0.986258
	2.07839		0.958052		0.972628		0.988311		0.994149		0.985673
	2.09698		0.959845		0.973755		0.988215		0.993357		0.985203
	2.11558		0.961778		0.974946		0.988094		0.99231		0.984258
	2.13417		0.963437		0.976042		0.988074		0.991483		0.983491
	2.15276		0.965172		0.977169		0.988017		0.990415		0.982278
	2.17136		0.966706		0.978209		0.988048		0.989576		0.981252
	2.18995		0.968207		0.979255		0.988065		0.988553		0.979885
	2.20854		0.969634		0.980231		0.988115		0.98769		0.97859
	2.22714		0.970888		0.981199		0.98822		0.986786		0.977205
	2.24573		0.972195		0.982097		0.988255		0.985854		0.975602
	2.26432		0.973248		0.983003		0.988467		0.985127		0.974286
	2.28291		0.974363		0.983803		0.988473		0.984112		0.972414
	2.30151		0.975318		0.984657		0.98874		0.983501		0.971063
	2.3201		0.976162		0.985375		0.988795		0.982524		0.969166
	2.33869		0.977053		0.986122		0.988968		0.981795		0.967446
	2.35729		0.977699		0.986839		0.989188		0.981063		0.965813
	2.37588		0.978378		0.987399		0.989159		0.980025		0.963574
	2.39447		0.979007		0.988118		0.989469		0.979455		0.961974
	2.41307		0.979392		0.988593		0.989444		0.978378		0.959726
	2.43166		0.979913		0.989094		0.989469		0.977429		0.957422
	2.45025		0.98027		0.989687		0.989707		0.976707		0.955565
	2.46884		0.98043		0.989933		0.989447		0.97532		0.952733
	2.48744		0.980792		0.99039		0.98951		0.974389		0.950329
	2.50603		0.980891		0.990805		0.989574		0.973383		0.94802
	2.52462		0.980838		0.990859		0.989128		0.971735		0.944688
	2.54322		0.981043		0.991245		0.989168		0.970727		0.942056
	2.56181		0.980934		0.991516		0.989102		0.969501		0.939354
	2.5804		0.980662		0.9914		0.988505		0.967625		0.935597
	2.59899		0.980721		0.991689		0.988487		0.966511		0.932667
	2.61759		0.980493		0.991914		0.988441		0.965281		0.929819
	2.63618		0.980005		0.991661		0.987756		0.963271		0.925798
	2.65477		0.979907		0.991802		0.987632		0.962031		0.922531
	2.67337		0.979674		0.992089		0.987775		0.961068		0.919839
	2.69196		0.979019		0.991801		0.987169		0.959163		0.915902
	2.71055		0.978698		0.991706		0.98684		0.957715		0.912234
	2.72915		0.978543		0.992069		0.98721		0.957145		0.909812
	2.74774		0.977887		0.991954		0.986991		0.9558		0.906556
	2.76633		0.977268		0.991596		0.986449		0.954152		0.902633
	2.78492		0.97711		0.991832		0.986774		0.953701		0.900133
	2.80352		0.976689		0.992064		0.987195		0.953349		0.898018
	2.82211		0.975881		0.991694		0.986815		0.952019		0.894624
	2.8407		0.975455		0.991517		0.986709		0.951198		0.891617
	2.8593		0.975299		0.991884		0.987456		0.951564		0.89022
	2.87789		0.974687		0.991925		0.987856		0.951485		0.888494
	2.89648		0.973909		0.991486		0.987577		0.950623		0.885657
	2.91508		0.973624		0.991431		0.987841		0.95066		0.883817
	2.93367		0.973443		0.991788		0.988822		0.951752		0.883538
	2.95226		0.972777		0.991726		0.989313		0.952242		0.882722
	2.97085		0.972065		0.991267		0.989189		0.95203		0.880936
	2.98945		0.971859		0.991196		0.989596		0.952729		0.880281
	3.00804		0.971724		0.991495		0.990682		0.954505		0.881293
	3.02663		0.97112		0.991427		0.991357		0.955796		0.881976
	3.04523		0.970452		0.990953		0.991353		0.956243		0.881597
	3.06382		0.970281		0.990756		0.991654		0.957276		0.882005
	3.08241		0.970273		0.990966		0.992668		0.959484		0.884259
	3.10101		0.96983		0.990967		0.993545		0.961607		0.886786
	3.1196		0.969173		0.990523		0.993698		0.962739		0.888154
	3.13819		0.968929		0.990149		0.993755		0.963796		0.889455
	3.15678		0.969019		0.990187		0.994441		0.965903		0.892394
	3.17538		0.968793		0.990251		0.9954		0.968555		0.896483
	3.19397		0.968118		0.989909		0.995835		0.970483		0.899864
	3.21256		0.967581		0.989368		0.995768		0.971629		0.902209
	3.23116		0.967499		0.989087		0.995936		0.973143		0.90512
	3.24975		0.967383		0.989031		0.996626		0.975591		0.909616
	3.26834		0.966687		0.988747		0.997291		0.978155		0.914633
	3.28693		0.965632		0.988074		0.997403		0.979881		0.91861
	3.30553		0.96484		0.987338		0.997187		0.981006		0.921674
	3.32412		0.964364		0.986815		0.997223		0.982538		0.925344
	3.34271		0.963558		0.986297		0.997608		0.984832		0.930375
	3.36131		0.961979		0.985406		0.997868		0.98716		0.93577
	3.3799		0.96		0.98413		0.997629		0.988731		0.940146
	3.39849		0.958273		0.982801		0.997079		0.989688		0.943494
	3.41709		0.956793		0.98158		0.996635		0.990832		0.947088
	3.43568		0.954834		0.980192		0.996367		0.992566		0.951812
	3.45427		0.951869		0.978288		0.995937		0.994434		0.957095
	3.47286		0.948256		0.975913		0.995058		0.995727		0.961662
	3.49146		0.944814		0.973452		0.993834		0.996322		0.965036
	3.51005		0.941776		0.9711		0.992554		0.996735		0.968009
	3.52864		0.938432		0.968552		0.991281		0.99745		0.971631
	3.54724		0.933913		0.965335		0.989766		0.998356		0.976011
	3.56583		0.928218		0.96139		0.987779		0.998927		0.980241
	3.58442		0.922299		0.957199		0.985412		0.99884		0.983426
	3.60302		0.917038		0.953258		0.982956		0.998282		0.985601
	3.62161		0.91224		0.949477		0.980515		0.997665		0.987589
	3.6402		0.906748		0.945195		0.977819		0.997119		0.990062
	3.65879		0.899614		0.939856		0.974504		0.996358		0.992844
	3.67739		0.891146		0.933653		0.97055		0.995029		0.995136
	3.69598		0.882737		0.927438		0.966382		0.993126		0.99635
	3.71457		0.875573		0.921932		0.962472		0.990984		0.99665
	3.73317		0.869449		0.916982		0.958826		0.988889		0.996712
	3.75176		0.862847		0.911607		0.954889		0.986719		0.996984
	3.77035		0.85428		0.904878		0.950036		0.984026		0.99723
	3.78894		0.843723		0.896837		0.944207		0.980495		0.996774
	3.80754		0.832834		0.88863		0.938101		0.976339		0.995177
	3.82613		0.823685		0.881639		0.932672		0.972187		0.992676
	3.84472		0.817028		0.876322		0.928318		0.968551		0.989961
	3.86332		0.811546		0.871739		0.924471		0.965305		0.987499
	3.88191		0.80479		0.866228		0.919982		0.961703		0.985036
	3.9005		0.795159		0.85878		0.914072		0.956975		0.981747
	3.9191		0.783387		0.850034		0.907111		0.951052		0.976955
	3.93769		0.772342		0.842084		0.900583		0.944821		0.970801
	3.95628		0.765167		0.837135		0.896161		0.939633		0.964302
	3.97487		0.763035		0.835956		0.89455		0.936373		0.958655
	3.99347		0.764191		0.837281		0.89495		0.934778		0.95431
	4.01206		0.765112		0.83872		0.895633		0.933577		0.950518
	4.03065		0.763194		0.838697		0.895351		0.93146		0.945801
	4.04925		0.759274		0.838154		0.89466		0.928281		0.939123
	4.06784		0.758232		0.84078		0.896192		0.92567		0.931023
	4.08643		0.766986		0.851355		0.903487		0.926499		0.923896
	4.10503		0.790712		0.872903		0.918868		0.933353		0.921086
	4.12362		0.829235		0.904163		0.941454		0.946756		0.925166
	4.14221		0.875572		0.938819		0.966497		0.964164		0.936297
	4.1608		0.917623		0.967131		0.986556		0.980376		0.951591
	4.1794		0.942437		0.979413		0.994162		0.989334		0.965907
	4.19799		0.941235		0.969882		0.98484		0.986559		0.973816
	4.21658		0.913017		0.939201		0.959156		0.971141		0.971843
	4.23518		0.865209		0.894605		0.922882		0.946397		0.959994
	4.25377		0.811137		0.847565		0.885181		0.918868		0.941884
	4.27236		0.765424		0.809949		0.85556		0.896097		0.923433
	4.29095		0.739176		0.79021		0.84079		0.884075		0.910704
	4.30955		0.736741		0.790993		0.84294		0.885348		0.907787
	4.32814		0.755082		0.808895		0.859151		0.898449		0.915536
	4.34673		0.785653		0.836236		0.883048		0.918728		0.931552
	4.36533		0.817815		0.863963		0.907112		0.940145		0.951302
	4.38392		0.842376		0.884538		0.925061		0.957268		0.969808
	4.40251		0.854024		0.893826		0.933431		0.966756		0.983229
	4.42111		0.852033		0.891537		0.931962		0.967905		0.989797
	4.4397		0.83934		0.88034		0.922881		0.962232		0.989889
	4.45829		0.820646		0.864243		0.909553		0.952436		0.985365
	4.47688		0.800421		0.846935		0.895097		0.941212		0.978561
	4.49548		0.781523		0.830702		0.881455		0.930379		0.971378
	4.51407		0.764779		0.816139		0.869144		0.920554		0.964751
	4.53266		0.749443		0.802581		0.857606		0.911365		0.958642
	4.55126		0.734138		0.788909		0.84589		0.901997		0.952407
	4.56985		0.717807		0.774326		0.833313		0.891779		0.945328
	4.58844		0.700289		0.7588		0.819844		0.880572		0.937055
	4.60704		0.682363		0.743067		0.806113		0.868836		0.927787
	4.62563		0.665352		0.728265		0.793107		0.857409		0.918178
	4.64422		0.650518		0.715429		0.781733		0.847135		0.909041
	4.66281		0.638537		0.705063		0.772447		0.838523		0.901011
	4.68141		0.629255		0.696961		0.765095		0.831556		0.894301
	4.7		0.621783		0.690316		0.758998		0.825733		0.888653

## Sheet: P
Wavelength(μm)	1	460	0.926259	560	0.901235	660	0.86159	760	0.824267	860	0.793024
	1.01859		0.921257		0.895628		0.85962		0.82664		0.798715
	1.03719		0.916184		0.891172		0.859011		0.830145		0.805369
	1.05578		0.911178		0.887752		0.859609		0.834585		0.812769
	1.07437		0.906421		0.885348		0.861331		0.839823		0.820665
	1.09296		0.902039		0.883907		0.864032		0.845656		0.828753
	1.11156		0.898041		0.883202		0.867394		0.851759		0.836685
	1.13015		0.894404		0.883052		0.871131		0.857881		0.844246
	1.14874		0.891105		0.883704		0.875283		0.864059		0.851503
	1.16734		0.888015		0.884844		0.879591		0.870071		0.858247
	1.18593		0.885106		0.8861		0.883815		0.875776		0.864466
	1.20452		0.882473		0.887996		0.888306		0.881482		0.870467
	1.22312		0.879931		0.889792		0.892657		0.886909		0.87607
	1.24171		0.877694		0.892137		0.897286		0.892418		0.881614
	1.2603		0.875579		0.894519		0.901923		0.897841		0.887022
	1.27889		0.873784		0.89713		0.906672		0.903245		0.892313
	1.29749		0.872236		0.900182		0.911668		0.908775		0.897672
	1.31608		0.870903		0.903286		0.916683		0.91426		0.902965
	1.33467		0.869912		0.906515		0.921738		0.919701		0.908168
	1.35327		0.869203		0.910025		0.926908		0.925162		0.913355
	1.37186		0.868695		0.913736		0.932144		0.930624		0.918535
	1.39045		0.868392		0.91752		0.93737		0.936038		0.923677
	1.40905		0.868305		0.921321		0.942544		0.941375		0.928761
	1.42764		0.868411		0.925129		0.947646		0.946624		0.93378
	1.44623		0.868672		0.92893		0.952656		0.95177		0.938732
	1.46482		0.869055		0.932704		0.957542		0.956795		0.943608
	1.48342		0.869536		0.936417		0.962271		0.961669		0.948393
	1.50201		0.870095		0.940038		0.966801		0.966359		0.953066
	1.5206		0.870717		0.943531		0.971091		0.970828		0.957597
	1.5392		0.871388		0.946859		0.9751		0.975036		0.961958
	1.55779		0.872098		0.949984		0.978788		0.978951		0.966118
	1.57638		0.872842		0.952866		0.982123		0.982545		0.970059
	1.59497		0.873622		0.955481		0.985087		0.985804		0.973767
	1.61357		0.87444		0.957834		0.987671		0.988718		0.977227
	1.63216		0.875285		0.959956		0.989874		0.991266		0.9804
	1.65075		0.876122		0.961864		0.99169		0.993424		0.983246
	1.66935		0.876907		0.963507		0.993119		0.995203		0.985768
	1.68794		0.877653		0.964816		0.994187		0.996654		0.988033
	1.70653		0.878431		0.96583		0.994924		0.997808		0.990055
	1.72513		0.879267		0.966693		0.995362		0.998637		0.991761
	1.74372		0.880049		0.967415		0.995542		0.999171		0.993164
	1.76231		0.880717		0.967852		0.99551		0.999523		0.994406
	1.7809		0.881428		0.968084		0.99528		0.999686		0.995453
	1.7995		0.882215		0.968317		0.9949		0.999625		0.996216
	1.81809		0.882858		0.968389		0.994445		0.999491		0.996879
	1.83668		0.883461		0.968259		0.993894		0.999281		0.997441
	1.85528		0.884201		0.968216		0.993286		0.998927		0.997767
	1.87387		0.884782		0.968043		0.99271		0.998618		0.998098
	1.89246		0.885336		0.967752		0.992086		0.99826		0.998327
	1.91106		0.886028		0.967604		0.991506		0.997862		0.998417
	1.92965		0.886486		0.967246		0.990981		0.997577		0.998593
	1.94824		0.887081		0.966991		0.990439		0.9972		0.998583
	1.96683		0.887623		0.966707		0.990025		0.99696		0.998657
	1.98543		0.888044		0.966336		0.989583		0.996694		0.998653
	2.00402		0.88865		0.966118		0.989257		0.996484		0.998623
	2.02261		0.888978		0.965696		0.988943		0.996346		0.998648
	2.04121		0.889563		0.965502		0.98869		0.996175		0.998548
	2.0598		0.889876		0.965087		0.988496		0.996144		0.998586
	2.07839		0.890408		0.964905		0.988311		0.996019		0.998443
	2.09698		0.890727		0.964518		0.988215		0.996066		0.998481
	2.11558		0.89122		0.964363		0.988094		0.99598		0.998303
	2.13417		0.891544		0.964016		0.988074		0.996078		0.998328
	2.15276		0.892039		0.963916		0.988017		0.996021		0.998118
	2.17136		0.892359		0.963627		0.988048		0.996139		0.998111
	2.18995		0.892909		0.963605		0.988065		0.996113		0.997881
	2.20854		0.893212		0.9634		0.988115		0.996201		0.997801
	2.22714		0.893839		0.963448		0.98822		0.99623		0.997593
	2.24573		0.894163		0.963379		0.988255		0.996222		0.997369
	2.26432		0.89487		0.963485		0.988467		0.99634		0.997239
	2.28291		0.89528		0.963594		0.988473		0.996196		0.996827
	2.30151		0.895993		0.963729		0.98874		0.996362		0.996753
	2.3201		0.896616		0.964032		0.988795		0.99617		0.996253
	2.33869		0.89724		0.9642		0.988968		0.996195		0.996036
	2.35729		0.898104		0.964617		0.989188		0.996156		0.995703
	2.37588		0.898671		0.964879		0.989159		0.995865		0.995135
	2.39447		0.899612		0.965263		0.989469		0.995968		0.995001
	2.41307		0.900316		0.965692		0.989444		0.995602		0.994342
	2.43166		0.90106		0.965933		0.989469		0.995401		0.993929
	2.45025		0.901986		0.966431		0.989707		0.995372		0.993677
	2.46884		0.902538		0.96668		0.989447		0.994792		0.992865
	2.48744		0.903356		0.966901		0.98951		0.994675		0.992604
	2.50603		0.904016		0.967331		0.989574		0.994471		0.992225
	2.52462		0.904414		0.967329		0.989128		0.99378		0.991384
	2.54322		0.905076		0.967463		0.989168		0.993701		0.99123
	2.56181		0.905367		0.967747		0.989102		0.993424		0.990839
	2.5804		0.905524		0.967492		0.988505		0.992666		0.990002
	2.59899		0.905888		0.967469		0.988487		0.992602		0.989922
	2.61759		0.905787		0.967661		0.988441		0.992418		0.989677
	2.63618		0.905623		0.967224		0.987756		0.991636		0.988857
	2.65477		0.905667		0.966981		0.987632		0.99153		0.988766
	2.67337		0.905214		0.967188		0.987775		0.991607		0.988812
	2.69196		0.904676		0.966757		0.987169		0.990931		0.988102
	2.71055		0.90444		0.966234		0.98684		0.990655		0.987839
	2.72915		0.903734		0.966451		0.98721		0.991019		0.988176
	2.74774		0.902778		0.966325		0.986991		0.990731		0.987823
	2.76633		0.902247		0.965596		0.986449		0.990224		0.987288
	2.78492		0.90144		0.965559		0.986774		0.990587		0.987601
	2.80352		0.900082		0.965904		0.987195		0.990931		0.987826
	2.82211		0.899088		0.965419		0.986815		0.990512		0.987291
	2.8407		0.898267		0.964868		0.986709		0.990436		0.987104
	2.8593		0.896735		0.965267		0.987456		0.991112		0.987588
	2.87789		0.895067		0.965571		0.987856		0.99136		0.987586
	2.89648		0.893982		0.964981		0.987577		0.991004		0.986991
	2.91508		0.892633		0.964697		0.987841		0.991185		0.986885
	2.93367		0.890496		0.965363		0.988822		0.991932		0.987234
	2.95226		0.888569		0.965712		0.989313		0.992145		0.987002
	2.97085		0.887209		0.965167		0.989189		0.991816		0.986226
	2.98945		0.885317		0.964991		0.989596		0.991959		0.98584
	3.00804		0.882622		0.965776		0.990682		0.992607		0.985829
	3.02663		0.880268		0.966304		0.991357		0.992808		0.985323
	3.04523		0.878512		0.965869		0.991353		0.992406		0.984216
	3.06382		0.876176		0.965567		0.991654		0.992242		0.983257
	3.08241		0.872923		0.966266		0.992668		0.99259		0.982658
	3.10101		0.869932		0.96706		0.993545		0.992734		0.981794
	3.1196		0.867721		0.966896		0.993698		0.992243		0.980314
	3.13819		0.865186		0.966379		0.993755		0.991634		0.978654
	3.15678		0.861586		0.966716		0.994441		0.991428		0.977233
	3.17538		0.857894		0.96772		0.9954		0.99133		0.975806
	3.19397		0.855166		0.968161		0.995835		0.990767		0.973931
	3.21256		0.852773		0.96776		0.995768		0.989772		0.971632
	3.23116		0.849456		0.967608		0.995936		0.988837		0.969261
	3.24975		0.845425		0.968467		0.996626		0.988125		0.966926
	3.26834		0.842086		0.969659		0.997291		0.987281		0.964393
	3.28693		0.839884		0.970118		0.997403		0.985997		0.961477
	3.30553		0.837641		0.969958		0.997187		0.984401		0.958243
	3.32412		0.834353		0.970276		0.997223		0.982782		0.954821
	3.34271		0.830731		0.971604		0.997608		0.981159		0.951198
	3.36131		0.828224		0.973206		0.997868		0.979312		0.947308
	3.3799		0.826994		0.974116		0.997629		0.977114		0.943161
	3.39849		0.825697		0.974413		0.997079		0.974651		0.938786
	3.41709		0.823343		0.975076		0.996635		0.972016		0.9341
	3.43568		0.820664		0.976694		0.996367		0.969151		0.928983
	3.45427		0.819193		0.978737		0.995937		0.965966		0.923493
	3.47286		0.8193		0.98024		0.995058		0.962516		0.91787
	3.49146		0.819721		0.980963		0.993834		0.958925		0.912253
	3.51005		0.819134		0.981629		0.992554		0.955164		0.906446
	3.52864		0.817788		0.983009		0.991281		0.951015		0.900086
	3.54724		0.81724		0.985007		0.989766		0.946335		0.893089
	3.56583		0.818525		0.986775		0.987779		0.941299		0.885844
	3.58442		0.820955		0.987666		0.985412		0.936277		0.878867
	3.60302		0.822873		0.987913		0.982956		0.931423		0.872238
	3.62161		0.823496		0.988307		0.980515		0.926433		0.865453
	3.6402		0.823782		0.989288		0.977819		0.920813		0.857904
	3.65879		0.825406		0.99044		0.974504		0.914418		0.849554
	3.67739		0.828972		0.990913		0.97055		0.907706		0.841092
	3.69598		0.833339		0.990291		0.966382		0.901386		0.833361
	3.71457		0.836741		0.988998		0.962472		0.895749		0.826554
	3.73317		0.838531		0.987833		0.958826		0.890324		0.81997
	3.75176		0.83981		0.987119		0.954889		0.88425		0.812611
	3.77035		0.842339		0.986317		0.950036		0.877085		0.804127
	3.78894		0.846793		0.984484		0.944207		0.869323		0.795262
	3.80754		0.852021		0.981157		0.938101		0.862113		0.787354
	3.82613		0.855984		0.976827		0.932672		0.85636		0.781252
	3.84472		0.857523		0.972546		0.928318		0.851935		0.776571
	3.86332		0.857347		0.968975		0.924471		0.847704		0.771937
	3.88191		0.85735		0.965714		0.919982		0.842425		0.7661
	3.9005		0.858835		0.961507		0.914072		0.835844		0.75907
	3.9191		0.861154		0.955235		0.907111		0.829129		0.752353
	3.93769		0.861934		0.946909		0.900583		0.824225		0.748028
	3.95628		0.858764		0.937868		0.896161		0.822546		0.747316
	3.97487		0.851009		0.929936		0.89455		0.823966		0.749693
	3.99347		0.840298		0.924115		0.89495		0.826911		0.753299
	4.01206		0.829226		0.919765		0.895633		0.829622		0.756491
	4.03065		0.819194		0.914961		0.895351		0.831795		0.759506
	4.04925		0.809044		0.907907		0.89466		0.835456		0.765051
	4.06784		0.795678		0.898576		0.896192		0.844292		0.777172
	4.08643		0.776527		0.889465		0.903487		0.861575		0.798827
	4.10503		0.752409		0.884868		0.918868		0.887713		0.829432
	4.12362		0.728904		0.888866		0.941454		0.91882		0.863821
	4.14221		0.715079		0.903034		0.966497		0.947247		0.893395
	4.1608		0.719894		0.925067		0.986556		0.964079		0.909163
	4.1794		0.747929		0.94912		0.994162		0.962603		0.905373
	4.19799		0.796539		0.967801		0.98484		0.941208		0.882113
	4.21658		0.855909		0.974983		0.959156		0.904437		0.845676
	4.23518		0.912088		0.968195		0.922882		0.861681		0.80651
	4.25377		0.951731		0.949599		0.885181		0.824042		0.77558
	4.27236		0.966548		0.925165		0.85556		0.800634		0.760614
	4.29095		0.955695		0.902484		0.84079		0.79573		0.763696
	4.30955		0.925348		0.888132		0.84294		0.807765		0.780991
	4.32814		0.885891		0.88562		0.859151		0.830392		0.80454
	4.34673		0.848066		0.894626		0.883048		0.854997		0.825263
	4.36533		0.819643		0.911615		0.907112		0.873626		0.835956
	4.38392		0.803727		0.931444		0.925061		0.881255		0.833246
	4.40251		0.799029		0.949216		0.933431		0.876736		0.81797
	4.42111		0.801583		0.961692		0.931962		0.862315		0.794109
	4.4397		0.806973		0.967862		0.922881		0.84216		0.766897
	4.45829		0.812112		0.968632		0.909553		0.820591		0.740917
	4.47688		0.816004		0.965938		0.895097		0.800692		0.71883
	4.49548		0.819427		0.96173		0.881455		0.783691		0.701076
	4.51407		0.823946		0.957241		0.869144		0.769169		0.686417
	4.53266		0.830797		0.952734		0.857606		0.755815		0.672958
	4.55126		0.840179		0.947721		0.84589		0.74233		0.659165
	4.56985		0.851144		0.941458		0.833313		0.728089		0.644488
	4.58844		0.862049		0.933445		0.819844		0.713366		0.629445
	4.60704		0.871258		0.923731		0.806113		0.699115		0.615232
	4.62563		0.877771		0.912926		0.793107		0.686476		0.603106
	4.64422		0.881515		0.901956		0.781733		0.676258		0.593821
	4.66281		0.883234		0.891704		0.772447		0.668604		0.587326
	4.68141		0.884079		0.882692		0.765095		0.662958		0.58282
	4.7		0.885086		0.874935		0.758998		0.658298		0.579076
