# Supplementary material for: High-performance absorber with substitutable materials for short-wave infrared sensing
Source: Frontiers journal article supplement (doi:10.3389/fspas.2024.1374951), 2024-03-06
Supplement: Table_5.XLSX [file Table_5.XLSX]

## Sheet: SiO2
Wavelength(μm)	1		R	0.0389558		T	1.06292e-05		A	0.961034
	1.01859			0.0461516			4.96213e-06			0.953843
	1.03719			0.0531009			4.82073e-06			0.946894
	1.05578			0.0597047			9.63427e-06			0.940286
	1.07437			0.0658857			4.03158e-06			0.93411
	1.09296			0.0715038			9.28028e-06			0.928487
	1.11156			0.0765529			7.49928e-06			0.92344
	1.13015			0.0810835			4.82406e-06			0.918912
	1.14874			0.0849562			1.13694e-05			0.915032
	1.16734			0.0883177			9.14378e-06			0.911673
	1.18593			0.0912207			4.95964e-06			0.908774
	1.20452			0.0936301			6.65364e-06			0.906363
	1.22312			0.095578			1.06948e-05			0.904411
	1.24171			0.097135			1.3057e-05			0.902852
	1.2603			0.0983583			1.34215e-05			0.901628
	1.27889			0.0992864			1.29893e-05			0.900701
	1.29749			0.0999497			1.27002e-05			0.900038
	1.31608			0.100377			1.29601e-05			0.89961
	1.33467			0.100597			1.38621e-05			0.899389
	1.35327			0.100639			1.52842e-05			0.899346
	1.37186			0.100531			1.67623e-05			0.899452
	1.39045			0.100297			1.73416e-05			0.899686
	1.40905			0.0999523			1.59241e-05			0.900032
	1.42764			0.0994941			1.26273e-05			0.900493
	1.44623			0.0989187			1.03396e-05			0.901071
	1.46482			0.0982547			1.32285e-05			0.901732
	1.48342			0.0975731			2.03701e-05			0.902407
	1.50201			0.0969112			2.28228e-05			0.903066
	1.5206			0.0961982			1.65429e-05			0.903785
	1.5392			0.0953858			1.49813e-05			0.904599
	1.55779			0.0946066			2.54311e-05			0.905368
	1.57638			0.0939253			2.67942e-05			0.906048
	1.59497			0.0931639			1.78446e-05			0.906818
	1.61357			0.0923878			2.76758e-05			0.907585
	1.63216			0.0917818			3.33383e-05			0.908185
	1.65075			0.091099			2.22007e-05			0.908879
	1.66935			0.0904429			3.70189e-05			0.90952
	1.68794			0.0899644			3.57202e-05			0.91
	1.70653			0.089346			3.09639e-05			0.910623
	1.72513			0.0889282			4.97222e-05			0.911022
	1.74372			0.0884816			3.37824e-05			0.911485
	1.76231			0.0880581			5.55195e-05			0.911886
	1.7809			0.08778			4.5352e-05			0.912175
	1.7995			0.0873728			5.88565e-05			0.912568
	1.81809			0.087205			5.97067e-05			0.912735
	1.83668			0.0868334			6.51706e-05			0.913101
	1.85528			0.0867278			7.40918e-05			0.913198
	1.87387			0.0863822			7.68495e-05			0.913541
	1.89246			0.086303			8.79335e-05			0.913609
	1.91106			0.0859613			9.56396e-05			0.913943
	1.92965			0.0858663			0.000100815			0.914033
	1.94824			0.0855187			0.000123553			0.914358
	1.96683			0.0853396			0.000113347			0.914547
	1.98543			0.0850039			0.000160071			0.914836
	2.00402			0.0846502			0.00013203			0.915218
	2.02261			0.0843452			0.000196419			0.915458
	2.04121			0.0837675			0.000173306			0.916059
	2.0598			0.0834221			0.000218141			0.91636
	2.07839			0.0827104			0.000248994			0.917041
	2.09698			0.0821158			0.000234456			0.91765
	2.11558			0.0814347			0.000328906			0.918236
	2.13417			0.0804671			0.000302904			0.91923
	2.15276			0.0797234			0.000360791			0.919916
	2.17136			0.0786286			0.000441759			0.92093
	2.18995			0.0774721			0.000406647			0.922121
	2.20854			0.0764374			0.000528882			0.923034
	2.22714			0.0749844			0.000587485			0.924428
	2.24573			0.073598			0.000568213			0.925834
	2.26432			0.0722522			0.000737193			0.927011
	2.28291			0.0704965			0.000797748			0.928706
	2.30151			0.0688399			0.000785864			0.930374
	2.3201			0.0672405			0.000991815			0.931768
	2.33869			0.0652527			0.00109462			0.933653
	2.35729			0.0633216			0.00106846			0.93561
	2.37588			0.0615489			0.00128368			0.937167
	2.39447			0.0594504			0.00148216			0.939067
	2.41307			0.0572825			0.00144721			0.94127
	2.43166			0.0553813			0.00159322			0.943025
	2.45025			0.053339			0.00190925			0.944752
	2.46884			0.0510669			0.00195957			0.946974
	2.48744			0.0490218			0.00195241			0.949026
	2.50603			0.0471339			0.00225901			0.950607
	2.52462			0.0450168			0.002532			0.952451
	2.54322			0.0428691			0.00248079			0.95465
	2.56181			0.0410289			0.00252697			0.956444
	2.5804			0.0392649			0.00289059			0.957845
	2.59899			0.0373042			0.00310887			0.959587
	2.61759			0.0353997			0.00298837			0.961612
	2.63618			0.0338095			0.00299827			0.963192
	2.65477			0.0323106			0.00333952			0.96435
	2.67337			0.030656			0.00355265			0.965791
	2.69196			0.0290343			0.00338369			0.967582
	2.71055			0.0277105			0.00324662			0.969043
	2.72915			0.0265663			0.00347095			0.969963
	2.74774			0.0253308			0.00372702			0.970942
	2.76633			0.0240401			0.00360251			0.972357
	2.78492			0.0229613			0.00328979			0.973749
	2.80352			0.0221607			0.00325513			0.974584
	2.82211			0.0214162			0.00349228			0.975092
	2.8407			0.0205662			0.00355307			0.975881
	2.8593			0.0197395			0.00324482			0.977016
	2.87789			0.0191541			0.00290392			0.977942
	2.89648			0.0188077			0.00288651			0.978306
	2.91508			0.018488			0.00306882			0.978443
	2.93367			0.0180588			0.00304768			0.978894
	2.95226			0.0176284			0.00270213			0.979669
	2.97085			0.0173986			0.00233689			0.980265
	2.98945			0.0174055			0.00226389			0.980331
	3.00804			0.0174737			0.00241042			0.980116
	3.02663			0.0174233			0.00243738			0.980139
	3.04523			0.0172751			0.00216977			0.980555
	3.06382			0.0172187			0.00179327			0.980988
	3.08241			0.0173916			0.00161288			0.980996
	3.10101			0.0177214			0.00169763			0.980581
	3.1196			0.0179986			0.00182203			0.980179
	3.13819			0.0180959			0.00173578			0.980168
	3.15678			0.0180991			0.00143472			0.980466
	3.17538			0.0182165			0.00114645			0.980637
	3.19397			0.0185659			0.00107735			0.980357
	3.21256			0.0190524			0.00120477			0.979743
	3.23116			0.019456			0.00131692			0.979227
	3.24975			0.0196401			0.00123415			0.979126
	3.26834			0.0196805			0.00097884			0.979341
	3.28693			0.0197972			0.000739188			0.979464
	3.30553			0.0201546			0.000682563			0.979163
	3.32412			0.0207109			0.000804534			0.978485
	3.34271			0.0212495			0.000944749			0.977806
	3.36131			0.0215605			0.000938316			0.977501
	3.3799			0.0216162			0.000758137			0.977626
	3.39849			0.0215942			0.000528513			0.977877
	3.41709			0.0217331			0.000411591			0.977855
	3.43568			0.0221382			0.000472068			0.97739
	3.45427			0.022693			0.000630991			0.976676
	3.47286			0.0231395			0.000736633			0.976124
	3.49146			0.0232652			0.000686521			0.976048
	3.51005			0.023054			0.000502865			0.976443
	3.52864			0.0226944			0.000309037			0.976997
	3.54724			0.0224419			0.000233088			0.977325
	3.56583			0.0224376			0.000314411			0.977248
	3.58442			0.0226057			0.000479742			0.976915
	3.60302			0.0226979			0.000599665			0.976702
	3.62161			0.0224492			0.000580407			0.97697
	3.6402			0.0217407			0.000426114			0.977833
	3.65879			0.0206681			0.000232344			0.9791
	3.67739			0.0194781			0.000119927			0.980402
	3.69598			0.0184172			0.000155851			0.981427
	3.71457			0.0175879			0.000312107			0.9821
	3.73317			0.0168956			0.000485752			0.982619
	3.75176			0.0161096			0.000564236			0.983326
	3.77035			0.0149985			0.000494066			0.984507
	3.78894			0.0134585			0.000311874			0.98623
	3.80754			0.0115665			0.000121609			0.988312
	3.82613			0.00953675			3.344e-05			0.99043
	3.84472			0.00761422			0.000100561			0.992285
	3.86332			0.00596795			0.00028922			0.993743
	3.88191			0.00464478			0.000497371			0.994858
	3.9005			0.00360427			0.000610502			0.995785
	3.9191			0.00281156			0.000564029			0.996624
	3.93769			0.00233444			0.000379266			0.997286
	3.95628			0.00239036			0.000154483			0.997455
	3.97487			0.00331687			1.55927e-05			0.996668
	3.99347			0.00547831			5.11065e-05			0.994471
	4.01206			0.00915365			0.000263722			0.990583
	4.03065			0.0144595			0.000563459			0.984977
	4.04925			0.0213456			0.000808527			0.977846
	4.06784			0.0296646			0.000878807			0.969457
	4.08643			0.0392841			0.000751947			0.959964
	4.10503			0.0501863			0.000549575			0.949264
	4.12362			0.0625034			0.000531498			0.936965
	4.14221			0.0764616			0.00103457			0.922504
	4.1608			0.0922425			0.00237297			0.905385
	4.1794			0.109807			0.00473049			0.885463
	4.19799			0.128741			0.00807905			0.86318
	4.21658			0.148188			0.0121497			0.839662
	4.23518			0.166901			0.0164669			0.816632
	4.25377			0.18341			0.0204375			0.796153
	4.27236			0.196278			0.0234727			0.780249
	4.29095			0.204373			0.0251101			0.770517
	4.30955			0.207094			0.0251078			0.767798
	4.32814			0.204495			0.0234874			0.772018
	4.34673			0.197268			0.0205205			0.782211
	4.36533			0.186604			0.016665			0.796731
	4.38392			0.173966			0.0124686			0.813565
	4.40251			0.160816			0.00846344			0.830721
	4.42111			0.148369			0.00507637			0.846555
	4.4397			0.13743			0.00256923			0.860001
	4.45829			0.128315			0.00101946			0.870666
	4.47688			0.120888			0.000338361			0.878774
	4.49548			0.114683			0.000318006			0.884999
	4.51407			0.109062			0.000692678			0.890245
	4.53266			0.103395			0.00120017			0.895405
	4.55126			0.0971979			0.00163059			0.901172
	4.56985			0.0902176			0.00185516			0.907927
	4.58844			0.0824572			0.00183286			0.91571
	4.60704			0.0741361			0.0015978			0.924266
	4.62563			0.0656134			0.00123375			0.933153
	4.64422			0.0572919			0.000843489			0.941865
	4.66281			0.0495296			0.00052049			0.94995
	4.68141			0.0425748			0.000328419			0.957097
	4.7			0.0365361			0.000291242			0.963173

## Sheet: InP
Wavelength(μm)	1		R	0.0949765		T	1.00575e-05		A	0.905013
	1.01859			0.0978771			8.53951e-06			0.902114
	1.03719			0.0986934			6.84418e-06			0.9013
	1.05578			0.0985679			7.81362e-06			0.901424
	1.07437			0.0976651			8.78949e-06			0.902326
	1.09296			0.0957564			9.10591e-06			0.904234
	1.11156			0.092887			8.97518e-06			0.907104
	1.13015			0.0895785			8.44543e-06			0.910413
	1.14874			0.08619			7.79375e-06			0.913802
	1.16734			0.0827405			8.42497e-06			0.917251
	1.18593			0.0788924			1.07477e-05			0.921097
	1.20452			0.0749116			1.06079e-05			0.925078
	1.22312			0.0713668			9.75879e-06			0.928623
	1.24171			0.0673023			1.29892e-05			0.932685
	1.2603			0.063606			1.10983e-05			0.936383
	1.27889			0.0595869			1.47438e-05			0.940398
	1.29749			0.0559065			1.2858e-05			0.944081
	1.31608			0.0517899			1.67854e-05			0.948193
	1.33467			0.0480881			1.65226e-05			0.951895
	1.35327			0.0442561			1.69228e-05			0.955727
	1.37186			0.0403103			2.14147e-05			0.959668
	1.39045			0.0366734			2.25994e-05			0.963304
	1.40905			0.0332188			2.21381e-05			0.966759
	1.42764			0.0297839			2.44903e-05			0.970192
	1.44623			0.0264326			2.91463e-05			0.973538
	1.46482			0.023277			3.37575e-05			0.976689
	1.48342			0.0203712			3.7421e-05			0.979591
	1.50201			0.0177296			4.05506e-05			0.98223
	1.5206			0.0153614			4.38241e-05			0.984595
	1.5392			0.0132824			4.76968e-05			0.98667
	1.55779			0.0115147			5.24059e-05			0.988433
	1.57638			0.0100832			5.80853e-05			0.989859
	1.59497			0.00901328			6.47919e-05			0.990922
	1.61357			0.00832679			7.23818e-05			0.991601
	1.63216			0.00803327			8.02879e-05			0.991886
	1.65075			0.00811978			8.74703e-05			0.991793
	1.66935			0.00855352			9.30675e-05			0.991353
	1.68794			0.00931476			9.79729e-05			0.990587
	1.70653			0.0104405			0.000105896			0.989454
	1.72513			0.0119969			0.000120646			0.987882
	1.74372			0.0139458			0.000139533			0.985915
	1.76231			0.0161021			0.000152679			0.983745
	1.7809			0.0183935			0.000157817			0.981449
	1.7995			0.0210253			0.000170759			0.978804
	1.81809			0.0240061			0.000199057			0.975795
	1.83668			0.0269265			0.000218812			0.972855
	1.85528			0.0298424			0.000224592			0.969933
	1.87387			0.033156			0.000252834			0.966591
	1.89246			0.0363504			0.000288797			0.963361
	1.91106			0.0392753			0.000296669			0.960428
	1.92965			0.0426119			0.000330593			0.957058
	1.94824			0.0456004			0.000375976			0.954024
	1.96683			0.0483456			0.000385733			0.951269
	1.98543			0.0514651			0.000443064			0.948092
	2.00402			0.0538205			0.000481135			0.945698
	2.02261			0.0564877			0.000511356			0.943001
	2.04121			0.0588163			0.000591602			0.940592
	2.0598			0.0607703			0.000610898			0.938619
	2.07839			0.0630253			0.000707625			0.936267
	2.09698			0.064381			0.000746817			0.934872
	2.11558			0.0663596			0.000841319			0.932799
	2.13417			0.0672761			0.000914765			0.931809
	2.15276			0.0688671			0.00100691			0.930126
	2.17136			0.0694158			0.00111462			0.92947
	2.18995			0.0706285			0.00121471			0.928157
	2.20854			0.0708203			0.00135039			0.927829
	2.22714			0.07173			0.0014737			0.926796
	2.24573			0.0715735			0.00162644			0.9268
	2.26432			0.0722616			0.00179355			0.925945
	2.28291			0.071822			0.00194633			0.926232
	2.30151			0.0723124			0.00218196			0.925506
	2.3201			0.0717699			0.0023176			0.925912
	2.33869			0.071977			0.00263461			0.925388
	2.35729			0.0716338			0.00276206			0.925604
	2.37588			0.0714104			0.00312483			0.925465
	2.39447			0.07153			0.00331442			0.925156
	2.41307			0.0709159			0.00362238			0.925462
	2.43166			0.0713877			0.00397433			0.924638
	2.45025			0.0708851			0.00416127			0.924954
	2.46884			0.0711303			0.0046408			0.924229
	2.48744			0.0713979			0.00485026			0.923752
	2.50603			0.0710991			0.00520625			0.923695
	2.52462			0.0719331			0.00565934			0.922408
	2.54322			0.0718622			0.00581035			0.922327
	2.56181			0.0721564			0.00630214			0.921541
	2.5804			0.0730344			0.00663557			0.92033
	2.59899			0.0728372			0.00678563			0.920377
	2.61759			0.0735068			0.00731375			0.919179
	2.63618			0.0741718			0.00752537			0.918303
	2.65477			0.0738802			0.0076445			0.918475
	2.67337			0.0745822			0.00814023			0.917278
	2.69196			0.0749826			0.00825522			0.916762
	2.71055			0.0744623			0.00826997			0.917268
	2.72915			0.0749075			0.00869171			0.916401
	2.74774			0.0750693			0.00875662			0.916174
	2.76633			0.0741795			0.00859998			0.917221
	2.78492			0.0741089			0.00889081			0.917
	2.80352			0.0740712			0.00898068			0.916948
	2.82211			0.0728089			0.00865259			0.918539
	2.8407			0.0719703			0.00870527			0.919324
	2.8593			0.071658			0.00887154			0.91947
	2.87789			0.0701752			0.00850791			0.921317
	2.89648			0.068378			0.00821676			0.923405
	2.91508			0.0674584			0.00835837			0.924183
	2.93367			0.0660157			0.00819154			0.925793
	2.95226			0.0635068			0.00765004			0.928843
	2.97085			0.061493			0.00748878			0.931018
	2.98945			0.0599693			0.00755652			0.932474
	3.00804			0.0574722			0.00716299			0.935365
	3.02663			0.0544173			0.00660795			0.938975
	3.04523			0.0521283			0.00651347			0.941358
	3.06382			0.0500109			0.00651182			0.943477
	3.08241			0.046953			0.00604435			0.947003
	3.10101			0.0436749			0.00550261			0.950822
	3.1196			0.0412029			0.0054175			0.95338
	3.13819			0.0388749			0.00542383			0.955701
	3.15678			0.0357914			0.00500015			0.959208
	3.17538			0.0325787			0.00445609			0.962965
	3.19397			0.0301343			0.00432644			0.965539
	3.21256			0.0279991			0.00439598			0.967605
	3.23116			0.0253371			0.00411849			0.970544
	3.24975			0.0224761			0.00358551			0.973938
	3.26834			0.0202535			0.00333921			0.976407
	3.28693			0.0185586			0.00343925			0.978002
	3.30553			0.0166386			0.00338811			0.979973
	3.32412			0.0144415			0.00296539			0.982593
	3.34271			0.012654			0.002565			0.984781
	3.36131			0.0115324			0.00254785			0.98592
	3.3799			0.0105545			0.00268778			0.986758
	3.39849			0.00935316			0.00254135			0.988105
	3.41709			0.0083144			0.00211616			0.989569
	3.43568			0.00793353			0.00183742			0.990229
	3.45427			0.00804754			0.00191777			0.990035
	3.47286			0.00814378			0.00206704			0.989789
	3.49146			0.00819865			0.001917			0.989884
	3.51005			0.00873691			0.00152552			0.989738
	3.52864			0.0100474			0.00127906			0.988674
	3.54724			0.0117449			0.00136918			0.986886
	3.56583			0.0133239			0.00155337			0.985123
	3.58442			0.0149103			0.00148222			0.983607
	3.60302			0.01714			0.00114022			0.98172
	3.62161			0.0203066			0.000849809			0.978844
	3.6402			0.0239176			0.000866941			0.975215
	3.65879			0.0272698			0.00107971			0.97165
	3.67739			0.0303417			0.00115478			0.968504
	3.69598			0.0338786			0.000930001			0.965191
	3.71457			0.0385231			0.000590563			0.960886
	3.73317			0.044			0.000447958			0.955552
	3.75176			0.0493262			0.000592842			0.950081
	3.77035			0.0538535			0.000806065			0.94534
	3.78894			0.0580016			0.000804791			0.941194
	3.80754			0.0628572			0.000542335			0.9366
	3.82613			0.0690181			0.000247329			0.930735
	3.84472			0.0758744			0.000179016			0.923947
	3.86332			0.0820885			0.00036369			0.917548
	3.88191			0.0868368			0.000576797			0.912586
	3.9005			0.09061			0.000574525			0.908815
	3.9191			0.0947708			0.000334872			0.904894
	3.93769			0.100236			7.33589e-05			0.899691
	3.95628			0.106478			2.74999e-05			0.893495
	3.97487			0.111776			0.00022515			0.887999
	3.99347			0.114531			0.000459728			0.885009
	4.01206			0.114528			0.000494314			0.884978
	4.03065			0.112996			0.000299508			0.886704
	4.04925			0.111336			9.4574e-05			0.888569
	4.06784			0.109488			0.000138871			0.890373
	4.08643			0.1053			0.000456635			0.894243
	4.10503			0.0956061			0.000768974			0.903625
	4.12362			0.0784709			0.000766189			0.920763
	4.14221			0.0551628			0.000579407			0.944258
	4.1608			0.0304799			0.00110802			0.968412
	4.1794			0.0110222			0.0038875			0.98509
	4.19799			0.00225396			0.0104406			0.987305
	4.21658			0.00592813			0.0213859			0.972686
	4.23518			0.0192442			0.035773			0.944983
	4.25377			0.0361498			0.0510456			0.912805
	4.27236			0.0500676			0.063739			0.886193
	4.29095			0.0566624			0.070652			0.872686
	4.30955			0.0553671			0.0699953			0.874638
	4.32814			0.0491147			0.0620283			0.888857
	4.34673			0.0426309			0.0489297			0.908439
	4.36533			0.0402488			0.0339886			0.925763
	4.38392			0.0442743			0.0204777			0.935248
	4.40251			0.0545011			0.0106626			0.934836
	4.42111			0.0688559			0.00529651			0.925848
	4.4397			0.0846558			0.00371283			0.911631
	4.45829			0.0997993			0.00437888			0.895822
	4.47688			0.113392			0.0056243			0.880984
	4.49548			0.125675			0.00624303			0.868082
	4.51407			0.137455			0.00577663			0.856768
	4.53266			0.14944			0.00444829			0.846112
	4.55126			0.161798			0.00285727			0.835345
	4.56985			0.17411			0.00161028			0.82428
	4.58844			0.185645			0.0010495			0.813305
	4.60704			0.195757			0.00116128			0.803082
	4.62563			0.204198			0.00165765			0.794144
	4.64422			0.211193			0.00215596			0.786651
	4.66281			0.217293			0.00235973			0.780347
	4.68141			0.223109			0.00216566			0.774725
	4.7			0.229052			0.00166831			0.76928

## Sheet: Si3N4
Wavelength(μm)	1		R	0.014948		T	5.87897e-06		A	0.985046
	1.01859			0.0138132			1.00391e-05			0.986177
	1.03719			0.0129741			1.27539e-05			0.987013
	1.05578			0.0125535			1.31594e-05			0.987433
	1.07437			0.0126492			1.15823e-05			0.987339
	1.09296			0.0133363			9.67493e-06			0.986654
	1.11156			0.0146536			1.25167e-05			0.985334
	1.13015			0.0166263			1.99996e-05			0.983354
	1.14874			0.0193324			1.71039e-05			0.98065
	1.16734			0.0227456			1.39674e-05			0.97724
	1.18593			0.0267221			2.32813e-05			0.973255
	1.20452			0.03139			1.47086e-05			0.968595
	1.22312			0.0364602			2.52756e-05			0.963515
	1.24171			0.0420729			1.68348e-05			0.95791
	1.2603			0.047892			2.45278e-05			0.952083
	1.27889			0.0540087			2.48173e-05			0.945966
	1.29749			0.0602697			1.86055e-05			0.939712
	1.31608			0.0664504			2.59779e-05			0.933524
	1.33467			0.0725886			3.04086e-05			0.927381
	1.35327			0.0786364			2.57675e-05			0.921338
	1.37186			0.0844453			2.17877e-05			0.915533
	1.39045			0.08992			2.31965e-05			0.910057
	1.40905			0.0950323			2.76011e-05			0.90494
	1.42764			0.0997735			3.19118e-05			0.900195
	1.44623			0.104133			3.49952e-05			0.895832
	1.46482			0.108101			3.70377e-05			0.891862
	1.48342			0.111674			3.84969e-05			0.888288
	1.50201			0.114858			3.95784e-05			0.885102
	1.5206			0.117665			4.01015e-05			0.882295
	1.5392			0.120114			3.95878e-05			0.879846
	1.55779			0.122219			3.76509e-05			0.877743
	1.57638			0.123982			3.48174e-05			0.875983
	1.59497			0.125394			3.33782e-05			0.874573
	1.61357			0.126454			3.67695e-05			0.873509
	1.63216			0.127202			4.59101e-05			0.872752
	1.65075			0.127731			5.48429e-05			0.872214
	1.66935			0.128093			5.42016e-05			0.871853
	1.68794			0.128202			4.57522e-05			0.871752
	1.70653			0.127948			4.71041e-05			0.872005
	1.72513			0.127457			6.37105e-05			0.872479
	1.74372			0.126935			6.96334e-05			0.872995
	1.76231			0.126221			5.7436e-05			0.873722
	1.7809			0.125136			6.56709e-05			0.874798
	1.7995			0.124019			8.70711e-05			0.875894
	1.81809			0.122892			7.57489e-05			0.877032
	1.83668			0.121386			7.92905e-05			0.878535
	1.85528			0.119902			0.000107592			0.87999
	1.87387			0.11844			9.17624e-05			0.881468
	1.89246			0.116618			0.000108808			0.883273
	1.91106			0.115023			0.000130807			0.884846
	1.92965			0.113236			0.000112827			0.886651
	1.94824			0.111374			0.000158666			0.888467
	1.96683			0.109714			0.000142737			0.890143
	1.98543			0.107726			0.000175017			0.892099
	2.00402			0.106118			0.000188541			0.893693
	2.02261			0.10417			0.00019594			0.895634
	2.04121			0.102578			0.000240204			0.897182
	2.0598			0.100737			0.000230104			0.899033
	2.07839			0.0991801			0.000297259			0.900523
	2.09698			0.0974498			0.000279765			0.90227
	2.11558			0.0959737			0.00036312			0.903663
	2.13417			0.0943217			0.000347317			0.905331
	2.15276			0.0929651			0.000439669			0.906595
	2.17136			0.0913378			0.000439168			0.908223
	2.18995			0.0900887			0.000525042			0.909386
	2.20854			0.0884685			0.000565684			0.910966
	2.22714			0.0872929			0.000616891			0.91209
	2.24573			0.0856907			0.000732689			0.913577
	2.26432			0.084449			0.000726606			0.914824
	2.28291			0.0829537			0.000922018			0.916124
	2.30151			0.0814726			0.000896507			0.917631
	2.3201			0.0801369			0.00108793			0.918775
	2.33869			0.0783867			0.00117116			0.920442
	2.35729			0.0770342			0.00122755			0.921738
	2.37588			0.0752642			0.00149282			0.923243
	2.39447			0.0735505			0.00146926			0.92498
	2.41307			0.0719715			0.0017073			0.926321
	2.43166			0.0699151			0.00189717			0.928188
	2.45025			0.0682022			0.00188931			0.929908
	2.46884			0.0662946			0.00224418			0.931461
	2.48744			0.0641066			0.00234223			0.933551
	2.50603			0.0622998			0.00238787			0.935312
	2.52462			0.06015			0.00279174			0.937058
	2.54322			0.0578784			0.00283269			0.939289
	2.56181			0.0559639			0.00288648			0.94115
	2.5804			0.0536903			0.0033092			0.943001
	2.59899			0.0513371			0.00333379			0.945329
	2.61759			0.049346			0.00331408			0.94734
	2.63618			0.0470598			0.00372569			0.949215
	2.65477			0.0446313			0.0037957			0.951573
	2.67337			0.0425848			0.00363453			0.953781
	2.69196			0.0403973			0.00394741			0.955655
	2.71055			0.0379522			0.00414322			0.957905
	2.72915			0.0358393			0.00387284			0.960288
	2.74774			0.0338358			0.00392577			0.962238
	2.76633			0.0315277			0.00424133			0.964231
	2.78492			0.0293496			0.00406421			0.966586
	2.80352			0.0275113			0.00377134			0.968717
	2.82211			0.0255415			0.00396575			0.970493
	2.8407			0.0234314			0.00408511			0.972483
	2.8593			0.0216341			0.00370441			0.974661
	2.87789			0.0200491			0.00347216			0.976479
	2.89648			0.0182951			0.00367461			0.97803
	2.91508			0.0165436			0.00364948			0.979807
	2.93367			0.015125			0.00320322			0.981672
	2.95226			0.0138549			0.00298487			0.98316
	2.97085			0.0124503			0.00315737			0.984392
	2.98945			0.0110881			0.00311031			0.985802
	3.00804			0.0100257			0.00267213			0.987302
	3.02663			0.0091157			0.00240805			0.988476
	3.04523			0.00811474			0.00254047			0.989345
	3.06382			0.00712533			0.0025727			0.990302
	3.08241			0.00637698			0.0022144			0.991409
	3.10101			0.00581485			0.00187249			0.992313
	3.1196			0.00521795			0.00191361			0.992868
	3.13819			0.00457825			0.00205572			0.993366
	3.15678			0.00408691			0.00187547			0.994038
	3.17538			0.00380217			0.00149958			0.994698
	3.19397			0.00356372			0.00136689			0.995069
	3.21256			0.00325579			0.00152557			0.995219
	3.23116			0.00297616			0.0015863			0.995438
	3.24975			0.00286808			0.00133515			0.995797
	3.26834			0.00289871			0.00103641			0.996065
	3.28693			0.00291124			0.00101817			0.996071
	3.30553			0.00285286			0.00120131			0.995946
	3.32412			0.00284529			0.00123586			0.995919
	3.34271			0.00301083			0.000998105			0.995991
	3.36131			0.0033027			0.000743043			0.995954
	3.3799			0.00356472			0.00074294			0.995692
	3.39849			0.00373554			0.000931158			0.995333
	3.41709			0.0039337			0.00100668			0.99506
	3.43568			0.00431844			0.000825703			0.994856
	3.45427			0.00489658			0.000570472			0.994533
	3.47286			0.00550667			0.000510072			0.993983
	3.49146			0.00600216			0.000674336			0.993324
	3.51005			0.00642762			0.000830709			0.992742
	3.52864			0.00698872			0.000765077			0.992246
	3.54724			0.00784071			0.000523251			0.991636
	3.56583			0.00891651			0.000347611			0.990736
	3.58442			0.00997932			0.000402786			0.989618
	3.60302			0.0108568			0.00060193			0.988541
	3.62161			0.0116276			0.000709258			0.987663
	3.6402			0.0125687			0.000591178			0.98684
	3.65879			0.0139013			0.000348441			0.98575
	3.67739			0.0155676			0.0002055			0.984227
	3.69598			0.0172519			0.000283953			0.982464
	3.71457			0.0186433			0.000488308			0.980868
	3.73317			0.0197127			0.000605301			0.979682
	3.75176			0.0207585			0.000508772			0.978733
	3.77035			0.0221642			0.000273478			0.977562
	3.78894			0.0240611			0.000100096			0.975839
	3.80754			0.0261748			0.000130699			0.973695
	3.82613			0.0279921			0.000324684			0.971683
	3.84472			0.0291288			0.000499829			0.970371
	3.86332			0.0296138			0.000493886			0.969892
	3.88191			0.029864			0.000302919			0.969833
	3.9005			0.0303557			8.12514e-05			0.969563
	3.9191			0.0312279			9.20586e-06			0.968763
	3.93769			0.0321091			0.000142742			0.967748
	3.95628			0.0322949			0.000368512			0.967337
	3.97487			0.0311586			0.000498435			0.968343
	3.99347			0.0285115			0.000425684			0.971063
	4.01206			0.0246722			0.000216436			0.975111
	4.03065			0.0202164			6.22704e-05			0.979721
	4.04925			0.0156117			0.000125943			0.984262
	4.06784			0.0110319			0.00039833			0.98857
	4.08643			0.00653119			0.000685514			0.992783
	4.10503			0.002502			0.000760655			0.996737
	4.12362			0.000117119			0.000600992			0.999282
	4.14221			0.00139675			0.000559995			0.998043
	4.1608			0.00870778			0.00134386			0.989948
	4.1794			0.0238032			0.00376118			0.972436
	4.19799			0.0467874			0.00833911			0.944873
	4.21658			0.0754957			0.0149807			0.909524
	4.23518			0.105645			0.0228333			0.871522
	4.25377			0.131802			0.03045			0.837748
	4.27236			0.148868			0.0361979			0.814934
	4.29095			0.153571			0.0387637			0.807665
	4.30955			0.145415			0.0375651			0.81702
	4.32814			0.126791			0.0329202			0.840289
	4.34673			0.102213			0.0259256			0.871861
	4.36533			0.0770026			0.0181018			0.904896
	4.38392			0.0558678			0.0109429			0.933189
	4.40251			0.0418383			0.00552748			0.952634
	4.42111			0.0358343			0.00230506			0.961861
	4.4397			0.0369011			0.00110028			0.961999
	4.45829			0.0429224			0.00129786			0.95578
	4.47688			0.0514999			0.00211811			0.946382
	4.49548			0.0606894			0.00288046			0.93643
	4.51407			0.0693942			0.00317528			0.927431
	4.53266			0.0773703			0.00291045			0.919719
	4.55126			0.0849378			0.00224633			0.912816
	4.56985			0.0925744			0.00146628			0.905959
	4.58844			0.100567			0.000840178			0.898593
	4.60704			0.108841			0.000527619			0.890631
	4.62563			0.116986			0.000543694			0.88247
	4.64422			0.124442			0.000783986			0.874774
	4.66281			0.130732			0.00108648			0.868182
	4.68141			0.135638			0.00130066			0.863061
	4.7			0.139276			0.00133837			0.859386

## Sheet: GaAs
1	Wavelength(μm)	0.139217	R		5.66062e-06	T		0.860777	A
1.01859		0.139712			6.48262e-06			0.860282
1.03719		0.139025			6.92713e-06			0.860968
1.05578		0.137365			7.04974e-06			0.862628
1.07437		0.134865			6.94347e-06			0.865128
1.09296		0.131668			7.26071e-06			0.868325
1.11156		0.127939			8.82109e-06			0.872052
1.13015		0.123754			9.80102e-06			0.876236
1.14874		0.119263			8.98908e-06			0.880728
1.16734		0.114671			1.10959e-05			0.885318
1.18593		0.109901			1.10093e-05			0.890088
1.20452		0.10517			1.26778e-05			0.894817
1.22312		0.10034			1.27241e-05			0.899647
1.24171		0.095571			1.54805e-05			0.904414
1.2603		0.0907392			1.49554e-05			0.909246
1.27889		0.0858599			1.73168e-05			0.914123
1.29749		0.0809888			2.012e-05			0.918991
1.31608		0.0760555			2.05112e-05			0.923924
1.33467		0.0710471			2.16273e-05			0.928931
1.35327		0.0660093			2.48111e-05			0.933966
1.37186		0.0609761			2.86543e-05			0.938995
1.39045		0.055967			3.20464e-05			0.944001
1.40905		0.0510057			3.49998e-05			0.948959
1.42764		0.0461264			3.79639e-05			0.953836
1.44623		0.0413696			4.13029e-05			0.958589
1.46482		0.0367779			4.52091e-05			0.963177
1.48342		0.0323932			4.9778e-05			0.967557
1.50201		0.0282555			5.50493e-05			0.971689
1.5206		0.0244019			6.09438e-05			0.975537
1.5392		0.0208664			6.71183e-05			0.979066
1.55779		0.0176797			7.29012e-05			0.982247
1.57638		0.0148663			7.76701e-05			0.985056
1.59497		0.0124397			8.18786e-05			0.987478
1.61357		0.0103975			8.7831e-05			0.989515
1.63216		0.00872538			9.79607e-05			0.991177
1.65075		0.00740812			0.000110456			0.992481
1.66935		0.00643754			0.000118989			0.993443
1.68794		0.0057987			0.000122726			0.994079
1.70653		0.00544869			0.000132035			0.994419
1.72513		0.00532851			0.000149707			0.994522
1.74372		0.00540783			0.000159933			0.994432
1.76231		0.00567718			0.00016407			0.994159
1.7809		0.00607583			0.000183479			0.993741
1.7995		0.00653822			0.000200986			0.993261
1.81809		0.00708442			0.000204817			0.992711
1.83668		0.00766964			0.000229503			0.992101
1.85528		0.00821984			0.000247987			0.991532
1.87387		0.00879883			0.000255892			0.990945
1.89246		0.00932569			0.00029176			0.990383
1.91106		0.00979298			0.000301074			0.989906
1.92965		0.0102565			0.000331495			0.989412
1.94824		0.0105967			0.000361261			0.989042
1.96683		0.010947			0.000379368			0.988674
1.98543		0.0111775			0.00042961			0.988393
2.00402		0.011396			0.000442889			0.988161
2.02261		0.0115304			0.000507472			0.987962
2.04121		0.0116279			0.00052377			0.987848
2.0598		0.0116741			0.000600436			0.987725
2.07839		0.0116737			0.000623084			0.987703
2.09698		0.0116366			0.000714387			0.987649
2.11558		0.0115625			0.000743868			0.987694
2.13417		0.011443			0.000853965			0.987703
2.15276		0.0113168			0.000892392			0.987791
2.17136		0.0111132			0.00102122			0.987866
2.18995		0.0109481			0.00107943			0.987972
2.20854		0.0106609			0.0012149			0.988124
2.22714		0.0104522			0.00131839			0.988229
2.24573		0.0101069			0.0014362			0.988457
2.26432		0.00982608			0.00161316			0.988561
2.28291		0.0094709			0.00170525			0.988824
2.30151		0.0090882			0.00194098			0.988971
2.3201		0.00874953			0.00206525			0.989185
2.33869		0.00829479			0.00227378			0.989431
2.35729		0.00793928			0.00252329			0.989537
2.37588		0.00751826			0.00266024			0.989822
2.39447		0.00708866			0.00298557			0.989926
2.41307		0.00675153			0.0032015			0.990047
2.43166		0.00632464			0.00341293			0.990262
2.45025		0.00598562			0.00380156			0.990213
2.46884		0.00569268			0.00399516			0.990312
2.48744		0.00534168			0.0042758			0.990383
2.50603		0.00511847			0.00469571			0.990186
2.52462		0.0049087			0.00487539			0.990216
2.54322		0.00466696			0.00517633			0.990157
2.56181		0.00455747			0.00561669			0.989826
2.5804		0.00444531			0.00577838			0.989776
2.59899		0.00429788			0.0060247			0.989677
2.61759		0.00427168			0.00647041			0.989258
2.63618		0.00424308			0.00662582			0.989131
2.65477		0.00415006			0.00673396			0.989116
2.67337		0.00415493			0.007126			0.988719
2.69196		0.00418331			0.0073245			0.988492
2.71055		0.00411322			0.00726425			0.988623
2.72915		0.00408993			0.0074659			0.988444
2.74774		0.00413878			0.00773523			0.988126
2.76633		0.00409162			0.00762429			0.988284
2.78492		0.00400103			0.00750346			0.988496
2.80352		0.00400542			0.00769669			0.988298
2.82211		0.00399103			0.00773713			0.988272
2.8407		0.00385619			0.00742035			0.988723
2.8593		0.00374134			0.00725583			0.989003
2.87789		0.00370706			0.00736703			0.988926
2.89648		0.00360028			0.00724138			0.989158
2.91508		0.0033878			0.00680359			0.989809
2.93367		0.00322332			0.00656378			0.990213
2.95226		0.00312644			0.00660086			0.990273
2.97085		0.00295109			0.00642772			0.990621
2.98945		0.00268489			0.00593754			0.991378
3.00804		0.00247108			0.00559469			0.991934
3.02663		0.00233394			0.00557472			0.992091
3.04523		0.00214648			0.00546746			0.992386
3.06382		0.001877			0.00502191			0.993101
3.08241		0.00164382			0.00457332			0.993783
3.10101		0.00150043			0.0044577			0.994042
3.1196		0.00135274			0.00446128			0.994186
3.13819		0.00113571			0.00419416			0.99467
3.15678		0.00092284			0.00371899			0.995358
3.17538		0.00079373			0.0034331			0.995773
3.19397		0.00070584			0.00344651			0.995848
3.21256		0.000579958			0.00343198			0.995988
3.23116		0.000437689			0.00312874			0.996434
3.24975		0.000362908			0.00271628			0.996921
3.26834		0.000365574			0.0025379			0.997097
3.28693		0.00037715			0.00261405			0.997009
3.30553		0.000379715			0.00262951			0.996991
3.32412		0.000454498			0.00237274			0.997173
3.34271		0.000667688			0.00200981			0.997323
3.36131		0.000971547			0.0018509			0.997178
3.3799		0.00128344			0.00194785			0.996769
3.39849		0.00163822			0.00203999			0.996322
3.41709		0.00218591			0.00188752			0.995927
3.43568		0.003013			0.00155969			0.995427
3.45427		0.00402101			0.00133932			0.99464
3.47286		0.00504521			0.00138391			0.993571
3.49146		0.00609024			0.0015496			0.99236
3.51005		0.00738668			0.00156393			0.991049
3.52864		0.00916538			0.00133132			0.989503
3.54724		0.0113875			0.00103008			0.987582
3.56583		0.0137518			0.000912226			0.985336
3.58442		0.0160106			0.00103645			0.982953
3.60302		0.0182765			0.00121386			0.98051
3.62161		0.0209742			0.00120692			0.977819
3.6402		0.0244448			0.000967077			0.974588
3.65879		0.0285748			0.000676184			0.970749
3.67739		0.0328369			0.000564562			0.966599
3.69598		0.0367477			0.000691824			0.96256
3.71457		0.0403421			0.000896391			0.958762
3.73317		0.0442114			0.000949485			0.954839
3.75176		0.0490244			0.000762783			0.950213
3.77035		0.0549127			0.000462736			0.944625
3.78894		0.0612561			0.000274519			0.938469
3.80754		0.0670909			0.000326001			0.932583
3.82613		0.0718545			0.000542008			0.927603
3.84472		0.0758754			0.000712339			0.923412
3.86332		0.0801861			0.000668652			0.919145
3.88191		0.085745			0.000421074			0.913834
3.9005		0.0926186			0.000146476			0.907235
3.9191		0.0997435			4.39214e-05			0.900213
3.93769		0.105494			0.000176242			0.89433
3.95628		0.108704			0.000422363			0.890874
3.97487		0.109451			0.000575019			0.889974
3.99347		0.109002			0.000506125			0.890492
4.01206		0.108886			0.000271386			0.890843
4.03065		0.109609			7.17258e-05			0.890319
4.04925		0.109849			9.6128e-05			0.890055
4.06784		0.10673			0.000362056			0.892908
4.08643		0.0971871			0.000681928			0.902131
4.10503		0.0798069			0.000807357			0.919386
4.12362		0.0561844			0.00068487			0.943131
4.14221		0.031032			0.000670932			0.968297
4.1608		0.0108419			0.00155408			0.987604
4.1794		0.00159558			0.00432125			0.994083
4.19799		0.00647026			0.00973753			0.983792
4.21658		0.0245117			0.0179142			0.957574
4.23518		0.050826			0.0280648			0.921109
4.25377		0.0782058			0.0385796			0.883215
4.27236		0.0995351			0.0474203			0.853045
4.29095		0.110049			0.0527027			0.837248
4.30955		0.108646			0.053261			0.838093
4.32814		0.0978664			0.0489949			0.853139
4.34673		0.082688			0.040884			0.876428
4.36533		0.0686897			0.0306797			0.900631
4.38392		0.0602893			0.0203925			0.919318
4.40251		0.059641			0.0117523			0.928607
4.42111		0.0664554			0.00581041			0.927734
4.4397		0.0786409			0.00278582			0.918573
4.45829		0.0933967			0.00216848			0.904435
4.47688		0.108295			0.0030082			0.888697
4.49548		0.121982			0.00427225			0.873746
4.51407		0.134321			0.0051523			0.860527
4.53266		0.146052			0.00523896			0.848709
4.55126		0.158185			0.00453795			0.837277
4.56985		0.171409			0.00335622			0.825235
4.58844		0.185739			0.00212123			0.81214
4.60704		0.200507			0.00120418			0.798289
4.62563		0.214639			0.000802128			0.784559
4.64422		0.227079			0.000904033			0.772017
4.66281		0.237182			0.00133345			0.761485
4.68141		0.244936			0.0018382			0.753226
4.7		0.250934			0.00218813			0.746878
