# Supplementary material for: High-performance absorber with substitutable materials for short-wave infrared sensing
Source: Frontiers journal article supplement (doi:10.3389/fspas.2024.1374951), 2024-03-06
Supplement: Table_6.XLSX [file Table_6.XLSX]

## Sheet: TE
Wavelength(μm)	1		θ=0°	0.860777	θ=10°	1	0.865944	θ=20°	1	0.891893	θ=30°	1	0.923877	θ=40°	1	0.943474	θ=50°	1	0.965773	θ=60°	1	0.976425
	1.01859			0.860282		2	0.864054		2	0.890367		2	0.920981		2	0.937432		2	0.965516		2	0.981529
	1.03719			0.860968		3	0.86391		3	0.890021		3	0.919414		3	0.932408		3	0.965398		3	0.984044
	1.05578			0.862628		4	0.865136		4	0.890531		4	0.918828		4	0.928978		4	0.965238		4	0.983875
	1.07437			0.865128		5	0.86739		5	0.891689		5	0.918994		5	0.929591		5	0.964884		5	0.98103
	1.09296			0.868325		6	0.870413		6	0.89339		6	0.919764		6	0.946249		6	0.964003		6	0.975609
	1.11156			0.872052		7	0.873977		7	0.895578		7	0.920993		7	0.950147		7	0.962213		7	0.968342
	1.13015			0.876236		8	0.877803		8	0.898109		8	0.922527		8	0.95291		8	0.961602		8	0.960462
	1.14874			0.880728		9	0.88179		9	0.900782		9	0.92441		9	0.955388		9	0.963318		9	0.95077
	1.16734			0.885318		10	0.886148		10	0.903784		10	0.92675		10	0.957791		10	0.990904		10	0.941046
	1.18593			0.890088		11	0.890515		11	0.907075		11	0.929151		11	0.959907		11	0.993767		11	0.932599
	1.20452			0.894817		12	0.894904		12	0.910318		12	0.931803		12	0.962016		12	0.993659		12	0.926225
	1.22312			0.899647		13	0.89948		13	0.913938		13	0.9346		13	0.963935		13	0.993103		13	0.92479
	1.24171			0.904414		14	0.903961		14	0.917447		14	0.93749		14	0.965801		14	0.992445		14	0.965649
	1.2603			0.909246		15	0.90855		15	0.921267		15	0.940428		15	0.967462		15	0.991546		15	0.968216
	1.27889			0.914123		16	0.913217		16	0.925072		16	0.943542		16	0.969144		16	0.990544		16	0.968695
	1.29749			0.918991		17	0.917755		17	0.92893		17	0.94653		17	0.970616		17	0.989498		17	0.968059
	1.31608			0.923924		18	0.922477		18	0.933003		18	0.949638		18	0.972029		18	0.988325		18	0.966921
	1.33467			0.928931		19	0.927238		19	0.937056		19	0.952813		19	0.973446		19	0.98717		19	0.965542
	1.35327			0.933966		20	0.931914		20	0.941083		20	0.955899		20	0.974772		20	0.986093		20	0.964025
	1.37186			0.938995		21	0.936602		21	0.945186		21	0.958941		21	0.976016		21	0.985057		21	0.962413
	1.39045			0.944001		22	0.941351		22	0.949349		22	0.962001		22	0.97725		22	0.984078		22	0.960778
	1.40905			0.948959		23	0.946114		23	0.953501		23	0.965062		23	0.978502		23	0.983212		23	0.959198
	1.42764			0.953836		24	0.950833		24	0.957596		24	0.968084		24	0.979771		24	0.982501		24	0.95773
	1.44623			0.958589		25	0.95547		25	0.961612		25	0.97104		25	0.981052		25	0.981962		25	0.956402
	1.46482			0.963177		26	0.959996		26	0.965529		26	0.973914		26	0.982343		26	0.981599		26	0.95523
	1.48342			0.967557		27	0.964382		27	0.969325		27	0.976695		27	0.983645		27	0.981411		27	0.954227
	1.50201			0.971689		28	0.968595		28	0.97297		28	0.979367		28	0.984955		28	0.981395		28	0.953402
	1.5206			0.975537		29	0.972596		29	0.976432		29	0.981913		29	0.986267		29	0.981546		29	0.952763
	1.5392			0.979066		30	0.976347		30	0.979679		30	0.984315		30	0.987573		30	0.981855		30	0.952314
	1.55779			0.982247		31	0.979809		31	0.982679		31	0.986553		31	0.988861		31	0.982312		31	0.952059
	1.57638			0.985056		32	0.982954		32	0.985405		32	0.988613		32	0.990123		32	0.982907		32	0.952002
	1.59497			0.987478		33	0.98576		33	0.98784		33	0.990489		33	0.99135		33	0.983621		33	0.952142
	1.61357			0.989515		34	0.988219		34	0.989977		34	0.992176		34	0.992533		34	0.984426		34	0.952465
	1.63216			0.991177		35	0.99033		35	0.991819		35	0.993668		35	0.993649		35	0.985277		35	0.952926
	1.65075			0.992481		36	0.992089		36	0.993371		36	0.994951		36	0.994668		36	0.986136		36	0.953472
	1.66935			0.993443		37	0.993487		37	0.994626		37	0.99601		37	0.995573		37	0.987002		37	0.954094
	1.68794			0.994079		38	0.994524		38	0.99558		38	0.996849		38	0.996376		38	0.987907		38	0.95484
	1.70653			0.994419		39	0.995231		39	0.996247		39	0.997498		39	0.9971		39	0.988843		39	0.95574
	1.72513			0.994522		40	0.995661		40	0.996671		40	0.99798		40	0.997728		40	0.989723		40	0.956683
	1.74372			0.994432		41	0.99586		41	0.996897		41	0.998301		41	0.998231		41	0.990497		41	0.957538
	1.76231			0.994159		42	0.99584		42	0.996945		42	0.998467		42	0.998627		42	0.991251		42	0.958397
	1.7809			0.993741		43	0.995605		43	0.99681		43	0.998497		43	0.998955		43	0.99201		43	0.959366
	1.7995			0.993261		44	0.995233		44	0.996536		44	0.998431		44	0.999197		44	0.992642		44	0.960232
	1.81809			0.992711		45	0.994799		45	0.99621		45	0.998298		45	0.999349		45	0.993166		45	0.960905
	1.83668			0.992101		46	0.994254		46	0.995805		46	0.998084		46	0.999455		46	0.99371		46	0.961646
	1.85528			0.991532		47	0.993638		47	0.995314		47	0.997819		47	0.999507		47	0.994137		47	0.962275
	1.87387			0.990945		48	0.993077		48	0.994865		48	0.997565		48	0.999509		48	0.994439		48	0.962614
	1.89246			0.990383		49	0.992463		49	0.994397		49	0.997269		49	0.999492		49	0.99477		49	0.963014
	1.91106			0.989906		50	0.991859		50	0.9939		50	0.996976		50	0.999443		50	0.99495		50	0.963179
	1.92965			0.989412		51	0.991368		51	0.99352		51	0.996737		51	0.999385		51	0.995064		51	0.963095
	1.94824			0.989042		52	0.99081		52	0.99309		52	0.996461		52	0.999319		52	0.995181		52	0.963068
	1.96683			0.988674		53	0.990396		53	0.992752		53	0.996269		53	0.999245		53	0.995115		53	0.962612
	1.98543			0.988393		54	0.98999		54	0.992468		54	0.996078		54	0.999181		54	0.995108		54	0.962199
	2.00402			0.988161		55	0.989622		55	0.99217		55	0.995919		55	0.999108		55	0.994945		55	0.961514
	2.02261			0.987962		56	0.989378		56	0.992021		56	0.995828		56	0.999053		56	0.994773		56	0.960655
	2.04121			0.987848		57	0.989072		57	0.991792		57	0.995711		57	0.998992		57	0.994545		57	0.959771
	2.0598			0.987725		58	0.988953		58	0.991738		58	0.995698		58	0.998941		58	0.994221		58	0.95853
	2.07839			0.987703		59	0.988724		59	0.991588		59	0.99563		59	0.998891		59	0.993928		59	0.95744
	2.09698			0.987649		60	0.988695		60	0.991602		60	0.99567		60	0.998839		60	0.993478		60	0.955908
	2.11558			0.987694		61	0.988541		61	0.99152		61	0.995645		61	0.998793		61	0.993117		61	0.954632
	2.13417			0.987703		62	0.988584		62	0.991588		62	0.995717		62	0.99873		62	0.992567		62	0.952886
	2.15276			0.987791		63	0.98849		63	0.991552		63	0.995719		63	0.998677		63	0.992133		63	0.951463
	2.17136			0.987866		64	0.988594		64	0.991667		64	0.995812		64	0.998597		64	0.99151		64	0.949575
	2.18995			0.987972		65	0.988547		65	0.991656		65	0.995822		65	0.998519		65	0.990994		65	0.948036
	2.20854			0.988124		66	0.988703		66	0.991812		66	0.995924		66	0.998421		66	0.99033		66	0.946087
	2.22714			0.988229		67	0.988701		67	0.991815		67	0.99593		67	0.998296		67	0.989703		67	0.944424
	2.24573			0.988457		68	0.988885		68	0.991996		68	0.996028		68	0.998186		68	0.989046		68	0.942526
	2.26432			0.988561		69	0.988943		69	0.99202		69	0.996024		69	0.99799		69	0.98827		69	0.940682
	2.28291			0.988824		70	0.989109		70	0.992186		70	0.996096		70	0.997868		70	0.987652		70	0.93895
	2.30151			0.988971		71	0.989255		71	0.99226		71	0.996094		71	0.997602		71	0.986733		71	0.936892
	2.3201			0.989185		72	0.989352		72	0.992351		72	0.996099		72	0.997433		72	0.986107		72	0.935331
	2.33869			0.989431		73	0.989589		73	0.992503		73	0.996122		73	0.997147		73	0.985162		73	0.933199
	2.35729			0.989537		74	0.989615		74	0.99249		74	0.996027		74	0.996854		74	0.984371		74	0.931583
	2.37588			0.989822		75	0.989853		75	0.992671		75	0.996059		75	0.996611		75	0.983577		75	0.929718
	2.39447			0.989926		76	0.989902		76	0.992627		76	0.995908		76	0.996179		76	0.982535		76	0.927771
	2.41307			0.990047		77	0.989975		77	0.992678		77	0.995839		77	0.995914		77	0.981853		77	0.926309
	2.43166			0.990262		78	0.990136		78	0.992734		78	0.995748		78	0.995498		78	0.980813		78	0.924243
	2.45025			0.990213		79	0.990014		79	0.992566		79	0.99549		79	0.995041		79	0.979909		79	0.922713
	2.46884			0.990312		80	0.990124		80	0.992636		80	0.995426		80	0.994749		80	0.979182		80	0.921152
	2.48744			0.990383		81	0.990067		81	0.992478		81	0.995159		81	0.994196		81	0.978061		81	0.919219
	2.50603			0.990186		82	0.989854		82	0.992263		82	0.994871		82	0.993776		82	0.977326		82	0.918002
	2.52462			0.990216		83	0.989915		83	0.992274		83	0.994768		83	0.993438		83	0.976542		83	0.916393
	2.54322			0.990157		84	0.989651		84	0.991941		84	0.994371		84	0.992829		84	0.975472		84	0.914724
	2.56181			0.989826		85	0.989379		85	0.991702		85	0.994085		85	0.992461		85	0.974871		85	0.913711
	2.5804			0.989776		86	0.989382		86	0.991661		86	0.993964		86	0.992125		86	0.974106		86	0.912168
	2.59899			0.989677		87	0.988997		87	0.991236		87	0.993515		87	0.99152		87	0.97312		87	0.910711
	2.61759			0.989258		88	0.98868		88	0.990979		88	0.99324		88	0.991202		88	0.972617		88	0.909842
	2.63618			0.989131		89	0.988694		89	0.990966		89	0.993172		89	0.990942		89	0.971946		89	0.908417
	2.65477			0.989116		90	0.988311		90	0.990554		90	0.992758		90	0.990389		90	0.971023		90	0.907032
	2.67337			0.988719		91	0.987954		91	0.990275		91	0.992485		91	0.990095		91	0.970558		91	0.906229
	2.69196			0.988492		92	0.98805		92	0.990371		92	0.992535		92	0.989968		92	0.970025		92	0.904924
	2.71055			0.988623		93	0.987828		93	0.990109		93	0.992266		93	0.989522		93	0.969142		93	0.903459
	2.72915			0.988444		94	0.987441		94	0.989796		94	0.991974		94	0.989203		94	0.968614		94	0.902585
	2.74774			0.988126		95	0.9876		95	0.989993		95	0.992124		95	0.989192		95	0.968205		95	0.901385
	2.76633			0.988284		96	0.987701		96	0.990036		96	0.992123		96	0.988937		96	0.967385		96	0.899745
	2.78492			0.988496		97	0.987381		97	0.989748		97	0.991849		97	0.988568		97	0.966686		97	0.898597
	2.80352			0.988298		98	0.98746		98	0.989899		98	0.991958		98	0.988544		98	0.966288		98	0.897454
	2.82211			0.988272		99	0.987909		99	0.990299		99	0.992258		99	0.988516		99	0.965583		99	0.895677
	2.8407			0.988723		100	0.987919		100	0.990262		100	0.992176		100	0.988187		100	0.964689		100	0.894062
	2.8593			0.989003		101	0.987836		101	0.990235		101	0.992115		101	0.987989		101	0.964101		101	0.892824
	2.87789			0.988926		102	0.988343		102	0.990742		102	0.992488		102	0.988039		102	0.963489		102	0.891079
	2.89648			0.989158		103	0.988891		103	0.991185		103	0.992777		103	0.987894		103	0.962514		103	0.888983
	2.91508			0.989809		104	0.988942		104	0.991194		104	0.992702		104	0.987548		104	0.961595		104	0.887353
	2.93367			0.990213		105	0.989141		105	0.991415		105	0.992807		105	0.987395		105	0.9609		105	0.885765
	2.95226			0.990273		106	0.989893		106	0.992091		106	0.993254		106	0.987354		106	0.959983		106	0.883535
	2.97085			0.990621		107	0.990511		107	0.992561		107	0.993499		107	0.987082		107	0.958808		107	0.88128
	2.98945			0.991378		108	0.990656		108	0.992637		108	0.99343		108	0.986683		108	0.95781		108	0.87958
	3.00804			0.991934		109	0.990992		109	0.992943		109	0.993544		109	0.986439		109	0.956927		109	0.877723
	3.02663			0.992091		110	0.991822		110	0.993642		110	0.993931		110	0.986233		110	0.955751		110	0.875219
	3.04523			0.992386		111	0.99251		111	0.994138		111	0.994125		111	0.985833		111	0.954409		111	0.872858
	3.06382			0.993101		112	0.99272		112	0.994234		112	0.994016		112	0.985338		112	0.953303		112	0.87113
	3.08241			0.993783		113	0.993011		113	0.994455		113	0.994007		113	0.984935		113	0.952276		113	0.869223
	3.10101			0.994042		114	0.993758		114	0.995043		114	0.994235		114	0.984535		114	0.950915		114	0.866596
	3.1196			0.994186		115	0.99449		115	0.995548		115	0.99436		115	0.983988		115	0.949377		115	0.864043
	3.13819			0.99467		116	0.994761		116	0.995653		116	0.994195		116	0.983367		116	0.948108		116	0.862228
	3.15678			0.995358		117	0.994903		117	0.995693		117	0.993995		117	0.982785		117	0.946978		117	0.860418
	3.17538			0.995773		118	0.995405		118	0.996033		118	0.993972		118	0.98216		118	0.945474		118	0.857748
	3.19397			0.995848		119	0.996092		119	0.99647		119	0.993954		119	0.981386		119	0.943623		119	0.854749
	3.21256			0.995988		120	0.996459		120	0.996607		120	0.993713		120	0.980541		120	0.941963		120	0.852444
	3.23116			0.996434		121	0.996493		121	0.996489		121	0.993319		121	0.979725		121	0.940597		121	0.85057
	3.24975			0.996921		122	0.996636		122	0.996472		122	0.992962		122	0.978827		122	0.938947		122	0.84793
	3.26834			0.997097		123	0.997066		123	0.996644		123	0.992633		123	0.977685		123	0.936663		123	0.844293
	3.28693			0.997009		124	0.99745		124	0.996722		124	0.992173		124	0.976375		124	0.934203		124	0.84078
	3.30553			0.996991		125	0.99748		125	0.996506		125	0.991531		125	0.975098		125	0.932116		125	0.838102
	3.32412			0.997173		126	0.997299		126	0.996132		126	0.990794		126	0.973816		126	0.930137		126	0.835396
	3.34271			0.997323		127	0.997227		127	0.995807		127	0.989987		127	0.972236		127	0.927504		127	0.831438
	3.36131			0.997178		128	0.997279		128	0.995503		128	0.989025		128	0.970226		128	0.924067		128	0.826435
	3.3799			0.996769		129	0.997175		129	0.995025		129	0.987869		129	0.968042		129	0.920542		129	0.821766
	3.39849			0.996322		130	0.996751		130	0.9943		130	0.986595		130	0.965977		130	0.917505		130	0.818039
	3.41709			0.995927		131	0.996137		131	0.993422		131	0.985232		131	0.963894		131	0.914529		131	0.81418
	3.43568			0.995427		132	0.995509		132	0.992451		132	0.983648		132	0.961338		132	0.910694		132	0.808835
	3.45427			0.99464		133	0.994819		133	0.99131		133	0.9817		133	0.958124		133	0.90581		133	0.802197
	3.47286			0.993571		134	0.993888		134	0.989915		134	0.979461		134	0.954632		134	0.900737		134	0.795836
	3.49146			0.99236		135	0.992663		135	0.98832		135	0.977167		135	0.951365		135	0.896329		135	0.790742
	3.51005			0.991049		136	0.991264		136	0.986616		136	0.974891		136	0.948287		136	0.892329		136	0.786048
	3.52864			0.989503		137	0.989759		137	0.984741		137	0.972375		137	0.944788		137	0.887618		137	0.780044
	3.54724			0.987582		138	0.988014		138	0.982498		138	0.969288		138	0.940384		138	0.881551		138	0.772263
	3.56583			0.985336		139	0.985858		139	0.9798		139	0.965644		139	0.935341		139	0.874803		139	0.764147
	3.58442			0.982953		140	0.983334		140	0.976841		140	0.961867		140	0.930459		140	0.868694		140	0.757486
	3.60302			0.98051		141	0.980691		141	0.973906		141	0.958345		141	0.926202		141	0.863717		141	0.752406
	3.62161			0.977819		142	0.97807		142	0.971016		142	0.954957		142	0.92213		142	0.85894		142	0.747174
	3.6402			0.974588		143	0.975267		143	0.967816		143	0.951119		143	0.917306		143	0.852964		143	0.740064
	3.65879			0.970749		144	0.971895		144	0.963916		144	0.946381		144	0.911297		144	0.845462		144	0.731283
	3.67739			0.966599		145	0.967821		145	0.959342		145	0.940967		145	0.904723		145	0.837646		145	0.72291
	3.69598			0.96256		146	0.963393		146	0.954616		146	0.935656		146	0.898749		146	0.831153		146	0.716871
	3.71457			0.958762		147	0.95916		147	0.950289		147	0.931061		147	0.893957		147	0.82642		147	0.712994
	3.73317			0.954839		148	0.95531		148	0.946374		148	0.926987		148	0.889722		148	0.82219		148	0.709108
	3.75176			0.950213		149	0.951407		149	0.942242		149	0.922528		149	0.884735		149	0.816664		149	0.703109
	3.77035			0.944625		150	0.946736		150	0.937167		150	0.916897		150	0.878244		150	0.80926		150	0.695065
	3.78894			0.938469		151	0.941004		151	0.931053		151	0.910232		151	0.870873		151	0.801312		151	0.687342
	3.80754			0.932583		152	0.93473		152	0.924663		152	0.903632		152	0.864225		152	0.795032		152	0.682601
	3.82613			0.927603		153	0.92892		153	0.919072		153	0.898306		153	0.859565		153	0.791607		153	0.681443
	3.84472			0.923412		154	0.924238		154	0.914766		154	0.894527		154	0.856695		154	0.790107		154	0.681784
	3.86332			0.919145		155	0.920382		155	0.911154		155	0.891323		155	0.854036		155	0.788194		155	0.680587
	3.88191			0.913834		156	0.916247		156	0.906981		156	0.88722		156	0.849918		156	0.784118		156	0.676516
	3.9005			0.907235		157	0.910831		157	0.901379		157	0.881512		157	0.84407		157	0.778346		157	0.67131
	3.9191			0.900213		158	0.904185		158	0.894732		158	0.875038		158	0.838098		158	0.773491		158	0.6687
	3.93769			0.89433		159	0.897615		159	0.888635		159	0.869789		159	0.834485		159	0.772494		159	0.671646
	3.95628			0.890874		160	0.892904		160	0.884877		160	0.867569		160	0.834834		160	0.776436		160	0.680043
	3.97487			0.889974		161	0.891068		161	0.884181		161	0.868688		161	0.838662		161	0.783688		161	0.690725
	3.99347			0.890492		162	0.891606		162	0.885653		162	0.871706		162	0.843747		162	0.791137		162	0.699922
	4.01206			0.890843		163	0.892867		163	0.887456		163	0.874547		163	0.847887		163	0.796738		163	0.706466
	4.03065			0.890319		164	0.893431		164	0.888354		164	0.876293		164	0.8509		164	0.801568		164	0.713405
	4.04925			0.890055		165	0.893563		165	0.889082		165	0.878396		165	0.855418		165	0.809823		165	0.726665
	4.06784			0.892908		166	0.895692		166	0.892508		166	0.884351		166	0.865699		166	0.826452		166	0.751316
	4.08643			0.902131		167	0.903353		167	0.902227		167	0.897744		167	0.884956		167	0.853683		167	0.787577
	4.10503			0.919386		168	0.919009		168	0.920219		168	0.919686		168	0.912669		168	0.888492		168	0.829045
	4.12362			0.943131		169	0.941904		169	0.944859		169	0.947096		169	0.943504		169	0.922614		169	0.864375
	4.14221			0.968297		170	0.967242		170	0.970496		170	0.972942		170	0.968656		170	0.945378		170	0.881778
	4.1608			0.987604		171	0.987358		171	0.989063		171	0.988584		171	0.97915		171	0.948099		171	0.87417
	4.1794			0.994083		172	0.994506		172	0.993128		172	0.98722		172	0.969629		172	0.927922		172	0.842444
	4.19799			0.983792		173	0.984098		173	0.979053		173	0.966895		173	0.940847		173	0.889336		173	0.795351
	4.21658			0.957574		174	0.956887		174	0.948814		174	0.931668		174	0.899739		174	0.842646		174	0.746114
	4.23518			0.921109		175	0.919105		175	0.909643		175	0.890409		175	0.857028		175	0.800186		175	0.707428
	4.25377			0.883215		176	0.880462		176	0.871634		176	0.853747		176	0.823453		176	0.77194		176	0.687048
	4.27236			0.853045		177	0.850835		177	0.844301		177	0.83045		177	0.806186		177	0.762401		177	0.685727
	4.29095			0.837248		178	0.837004		178	0.833492		178	0.824688		178	0.806823		178	0.769768		178	0.698043
	4.30955			0.838093		179	0.840662		179	0.83979		179	0.835129		179	0.821547		179	0.7875		179	0.71538
	4.32814			0.853139		180	0.85835		180	0.858858		180	0.856019		180	0.843122		180	0.807284		180	0.729547
	4.34673			0.876428		181	0.883132		181	0.883406		181	0.879605		181	0.863742		181	0.822087		181	0.735506
	4.36533			0.900631		182	0.907198		182	0.905842		182	0.898827		182	0.877542		182	0.828107		182	0.732313
	4.38392			0.919318		183	0.924346		183	0.920586		183	0.909296		183	0.881933		183	0.825138		183	0.722279
	4.40251			0.928607		184	0.931496		184	0.925301		184	0.909977		184	0.877533		184	0.815552		184	0.709076
	4.42111			0.927734		185	0.928874		185	0.920793		185	0.902607		185	0.867005		185	0.802609		185	0.695804
	4.4397			0.918573		186	0.919078		186	0.909916		186	0.890328		186	0.853511		186	0.78893		186	0.683831
	4.45829			0.904435		187	0.905586		187	0.896058		187	0.876214		187	0.83944		187	0.7757		187	0.672734
	4.47688			0.888697		188	0.891358		188	0.881869		188	0.862263		188	0.825842		188	0.762745		188	0.661108
	4.49548			0.873746		189	0.878021		189	0.868619		189	0.849102		189	0.812598		189	0.74924		189	0.647707
	4.51407			0.860527		190	0.86579		190	0.856281		190	0.83635		190	0.799062		190	0.734562		190	0.632318
	4.53266			0.848709		191	0.853972		191	0.844108		191	0.823299		191	0.784781		191	0.71887		191	0.615998
	4.55126			0.837277		192	0.8417		192	0.831357		192	0.809558		192	0.769934		192	0.703179		192	0.600665
	4.56985			0.825235		193	0.828545		193	0.817814		193	0.795375		193	0.755352		193	0.688966		193	0.588282
	4.58844			0.81214		194	0.814774		194	0.80394		194	0.781561		194	0.742174		194	0.677547		194	0.580062
	4.60704			0.798289		195	0.801214		195	0.790653		195	0.76912		195	0.731348		195	0.669533		195	0.576006
	4.62563			0.784559		196	0.788856		196	0.778899		196	0.758797		196	0.723223		196	0.664596		196	0.574962
	4.64422			0.772017		197	0.77841		197	0.769235		197	0.75076		197	0.717415		197	0.661621		197	0.575117
	4.66281			0.761485		198	0.770017		198	0.761609		198	0.74454		198	0.712964		198	0.659153		198	0.574692
	4.68141			0.753226		199	0.763216		199	0.755399		199	0.739231		199	0.708717		199	0.655935		199	0.572567
	4.7			0.746878		200	0.757154		200	0.749682		200	0.733851		200	0.703749		200	0.651335		200	0.568594

## Sheet:  TM
0		0.856465		10		0.860208	20		0.874009		30		0.896227		40		0.895163		50		0.91099		60		0.940451
		0.854036				0.858962			0.8743				0.895778				0.899166				0.917992				0.943068
		0.853631				0.859388			0.875505				0.896066				0.904009				0.924345				0.944779
		0.854865				0.861113			0.877378				0.897088				0.909429				0.929517				0.945321
		0.85738				0.8638			0.879776				0.898807				0.916357				0.934188				0.94591
		0.860875				0.867202			0.882645				0.901178				0.925273				0.938783				0.945198
		0.865033				0.871109			0.885954				0.904169				0.927824				0.94221				0.944606
		0.869488				0.875257			0.889564				0.90767				0.931227				0.946				0.94372
		0.874111				0.879564			0.893308				0.911421				0.935027				0.950333				0.942206
		0.879094				0.884238			0.897405				0.915468				0.939037				0.958473				0.940781
		0.884042				0.888901			0.901747				0.919922				0.943305				0.959596				0.939428
		0.888988				0.893585			0.906027				0.924308				0.94746				0.961753				0.938399
		0.894067				0.898437			0.910647				0.929003				0.951701				0.963987				0.938611
		0.899015				0.90319			0.915123				0.933549				0.955748				0.966062				0.942745
		0.904014				0.908032			0.919865				0.938314				0.959695				0.968218				0.942193
		0.909058				0.912948			0.924571				0.9429				0.963538				0.970308				0.941805
		0.913925				0.91772			0.929274				0.947507				0.967127				0.972143				0.941353
		0.918937				0.922663			0.934151				0.952119				0.97053				0.973701				0.940756
		0.923965				0.927635			0.938964				0.95653				0.973767				0.975014				0.939959
		0.928882				0.93251			0.943688				0.960799				0.976774				0.976093				0.938908
		0.933787				0.937379			0.948415				0.964976				0.97951				0.976918				0.937555
		0.938738				0.942291			0.953127				0.968996				0.981969				0.977461				0.935845
		0.943696				0.947198			0.957748				0.972791				0.984149				0.977695				0.933733
		0.948605				0.95204			0.962225				0.976334				0.986037				0.977603				0.931197
		0.953427				0.956776			0.966527				0.979611				0.987617				0.977174				0.928275
		0.958136				0.961376			0.970631				0.982609				0.988874				0.976406				0.92507
		0.962703				0.96581			0.974509				0.985309				0.989797				0.975295				0.921655
		0.967091				0.970041			0.978128				0.987689				0.990381				0.973825				0.917948
		0.971262				0.974032			0.981455				0.989732				0.990625				0.971973				0.9138
		0.975176				0.977742			0.984459				0.991423				0.990535				0.969756				0.909376
		0.978792				0.981137			0.987113				0.992755				0.99012				0.967285				0.905132
		0.982077				0.984186			0.989398				0.993724				0.989397				0.964722				0.90102
		0.985011				0.986872			0.991303				0.994336				0.988379				0.962068				0.896587
		0.987582				0.989187			0.992831				0.994603				0.987091				0.959138				0.892307
		0.989788				0.991135			0.993995				0.994547				0.985577				0.955991				0.88868
		0.991623				0.992714			0.994818				0.994207				0.983913				0.953061				0.884906
		0.993078				0.993924			0.99532				0.993633				0.982162				0.950323				0.881388
		0.994153				0.994771			0.995519				0.992871				0.980319				0.94734				0.878763
		0.994881				0.995282			0.995431				0.991931				0.978384				0.944589				0.875876
		0.995316				0.995516			0.995099				0.99082				0.976479				0.942371				0.873786
		0.995509				0.995528			0.994603				0.989624				0.974704				0.939929				0.872159
		0.995469				0.995335			0.993993				0.988449				0.972958				0.93789				0.870469
		0.995203				0.994934			0.993239				0.987252				0.971262				0.936384				0.869914
		0.994794				0.994406			0.992382				0.985994				0.969822				0.934584				0.868875
		0.99432				0.993838			0.991557				0.984853				0.968491				0.933617				0.869012
		0.993727				0.993172			0.990717				0.983828				0.96723				0.932542				0.868706
		0.993061				0.992444			0.989818				0.982764				0.966291				0.931751				0.869316
		0.992454				0.991796			0.989051				0.981883				0.965397				0.931443				0.869605
		0.991788				0.991102			0.98831				0.981139				0.964665				0.930832				0.870597
		0.991136				0.990427			0.987564				0.980361				0.964196				0.931056				0.871254
		0.990598				0.989885			0.987018				0.979857				0.963673				0.930693				0.872587
		0.989991				0.989276			0.98642				0.979341				0.963484				0.93124				0.873389
		0.989537				0.988827			0.985968				0.978933				0.963229				0.931108				0.875026
		0.989085				0.988388			0.985598				0.978706				0.963191				0.931866				0.875831
		0.988679				0.987993			0.985214				0.978389				0.963188				0.931891				0.877671
		0.988397				0.987733			0.985036				0.97836				0.963247				0.9328				0.878509
		0.988054				0.987405			0.984744				0.97817				0.963432				0.932925				0.880296
		0.987904				0.98728			0.984696				0.978255				0.963571				0.933917				0.881422
		0.987642				0.987036			0.984508				0.978192				0.963881				0.934159				0.882793
		0.987589				0.987008			0.984551				0.978354				0.964097				0.935106				0.884456
		0.987406				0.986844			0.984454				0.978392				0.96448				0.935587				0.885343
		0.987431				0.986895			0.984574				0.978625				0.964779				0.936303				0.887263
		0.987314				0.986798			0.984545				0.978729				0.965191				0.937169				0.888286
		0.987409				0.986918			0.984738				0.979039				0.965594				0.937565				0.889666
		0.987346				0.986875			0.984756				0.979177				0.965987				0.938736				0.891427
		0.987499				0.987054			0.985019				0.97957				0.966514				0.939071				0.892239
		0.987491				0.987065			0.985076				0.979722				0.966854				0.940081				0.89399
		0.987677				0.987276			0.985384				0.980179				0.967488				0.94085				0.895389
		0.987741				0.987358			0.985498				0.980358				0.967798				0.941303				0.896222
		0.987912				0.987552			0.985792				0.980809				0.968422				0.942476				0.898027
		0.988077				0.987734			0.986003				0.981067				0.968808				0.942809				0.899121
		0.988182				0.987857			0.986207				0.9814				0.969236				0.943536				0.89987
		0.988445				0.988138			0.986532				0.981787				0.969776				0.944426				0.90151
		0.988485				0.988191			0.986621				0.981934				0.969955				0.944506				0.902352
		0.988746				0.988468			0.986965				0.982372				0.970466				0.945266				0.902786
		0.988823				0.988552			0.987047				0.98244				0.970644				0.945747				0.904097
		0.988911				0.988649			0.987201				0.982672				0.970757				0.945583				0.904749
		0.989104				0.98885			0.987406				0.982866				0.971091				0.946151				0.904697
		0.989001				0.988747			0.9873				0.98274				0.970903				0.946264				0.905489
		0.989128				0.988879			0.987469				0.982945				0.970931				0.945778				0.906075
		0.989101				0.988847			0.987395				0.982786				0.970967				0.946051				0.905603
		0.988894				0.988638			0.987193				0.982569				0.970487				0.945942				0.905643
		0.988973				0.988715			0.987273				0.98263				0.970386				0.945107				0.90621
		0.988727				0.98846			0.986956				0.982194				0.970186				0.945033				0.905752
		0.988452				0.98818			0.986689				0.981918				0.969492				0.944931				0.904964
		0.988468				0.988192			0.986682				0.981858				0.969268				0.943883				0.905155
		0.988092				0.987803			0.986227				0.981272				0.968999				0.943349				0.905218
		0.987762				0.987471			0.985914				0.980953				0.968185				0.943402				0.904178
		0.987781				0.987487			0.985911				0.980894				0.967843				0.942526				0.903393
		0.987402				0.987096			0.985449				0.980293				0.967686				0.941441				0.903604
		0.987025				0.986719			0.985095				0.979929				0.966898				0.941392				0.903359
		0.987119				0.986814			0.98519				0.97999				0.966382				0.941157				0.902058
		0.986902				0.986586			0.984886				0.979533				0.966402				0.939905				0.901186
		0.986495				0.986178			0.984487				0.979096				0.965886				0.939136				0.901354
		0.986642				0.986332			0.984675				0.979283				0.965167				0.939333				0.901115
		0.986752				0.986434			0.984707				0.979166				0.965178				0.938883				0.899732
		0.986421				0.986098			0.98434				0.978692				0.965166				0.937553				0.898566
		0.986481				0.986169			0.984467				0.978836				0.964503				0.937003				0.898594
		0.986938				0.986627			0.984899				0.979171				0.964171				0.937369				0.898683
		0.986955				0.986633			0.984826				0.978916				0.964498				0.936992				0.897583
		0.986856				0.986541			0.984759				0.97881				0.964419				0.9357				0.896069
		0.987363				0.98706			0.985322				0.979364				0.963849				0.935143				0.895641
		0.987934				0.987625			0.985817				0.979685				0.963852				0.935667				0.896088
		0.987994				0.987677			0.985808				0.979506				0.964359				0.935683				0.895841
		0.988189				0.987885			0.986065				0.979753				0.964327				0.934558				0.894438
		0.988962				0.988669			0.986868				0.980505				0.96388				0.933723				0.89321
		0.98962				0.989313			0.98742				0.980839				0.964023				0.934162				0.893284
		0.989784				0.989469			0.987518				0.980767				0.964639				0.934742				0.89394
		0.990132				0.989831			0.987929				0.981165				0.964737				0.934127				0.893665
		0.991001				0.990709			0.988814				0.98198				0.964337				0.932952				0.892278
		0.991743				0.991434			0.989434				0.982362				0.964397				0.932776				0.891158
		0.991989				0.991665			0.989588				0.982319				0.965036				0.933628				0.891384
		0.992305				0.991992			0.989951				0.982659				0.965347				0.933993				0.89233
		0.993101				0.9928			0.99078				0.983448				0.965017				0.933123				0.892502
		0.9939				0.993583			0.991469				0.983924				0.964848				0.932126				0.891432
		0.994223				0.993884			0.991666				0.983893				0.965369				0.932337				0.890249
		0.9944				0.994066			0.99186				0.984044				0.965967				0.933429				0.890296
		0.994953				0.99464			0.992493				0.984712				0.965931				0.933909				0.891551
		0.995717				0.995403			0.993219				0.985331				0.965592				0.933174				0.892676
		0.996157				0.99582			0.993527				0.98542				0.965774				0.9323				0.892552
		0.99624				0.995897			0.993571				0.985365				0.9665				0.932598				0.89152
		0.996435				0.996117			0.99387				0.985746				0.966974				0.933915				0.890981
		0.996944				0.996652			0.994464				0.986401				0.966787				0.934849				0.891878
		0.997423				0.997125			0.994885				0.986702				0.966494				0.934488				0.893697
		0.997533				0.997215			0.99489				0.986534				0.966771				0.933497				0.894998
		0.997414				0.997104			0.994794				0.986427				0.967425				0.933275				0.894853
		0.99742				0.997146			0.994938				0.986709				0.967658				0.93427				0.893741
		0.99758				0.997331			0.995177				0.987007				0.967147				0.93545				0.893037
		0.997594				0.997333			0.995108				0.986792				0.966447				0.935449				0.893668
		0.997268				0.996978			0.994645				0.986118				0.966203				0.934062				0.895213
		0.996737				0.996444			0.994091				0.985498				0.966255				0.932425				0.89626
		0.996211				0.995942			0.993648				0.985132				0.96581				0.931746				0.89565
		0.995657				0.995401			0.993116				0.984596				0.964416				0.93199				0.893471
		0.994871				0.994581			0.992161				0.983397				0.962502				0.931866				0.890955
		0.993767				0.993411			0.990773				0.981616				0.960822				0.93011				0.889402
		0.992466				0.992057			0.989249				0.979781				0.959494				0.926723				0.889053
		0.99107				0.99064			0.987752				0.97814				0.957803				0.922964				0.888849
		0.989471				0.989023			0.986044				0.976287				0.95499				0.92012				0.887245
		0.987481				0.986968			0.983756				0.973621				0.951113				0.918253				0.88341
		0.985099				0.984464			0.980868				0.970088				0.947011				0.916081				0.877882
		0.982554				0.981781			0.977765				0.966278				0.943378				0.912104				0.872182
		0.980016				0.979132			0.974782				0.962745				0.939967				0.905946				0.867693
		0.977325				0.976363			0.971752				0.959318				0.935779				0.898739				0.864626
		0.974106				0.973051			0.968119				0.955215				0.930071				0.892204				0.861825
		0.970188				0.968975			0.963547				0.949881				0.923163				0.887218				0.857535
		0.965863				0.964431			0.958349				0.943646				0.916218				0.883038				0.850612
		0.961668				0.960005			0.953254				0.937485				0.910162				0.877839				0.84135
		0.957836				0.955982			0.948679				0.932057				0.904766				0.870132				0.831382
		0.953989				0.951989			0.944241				0.926994				0.898776				0.859995				0.822706
		0.949429				0.947278			0.939053				0.921165				0.891017				0.849146				0.816445
		0.943814				0.941446			0.932565				0.913753				0.881526				0.839791				0.81211
		0.937588				0.934926			0.925195				0.905126				0.871688				0.833063				0.807833
		0.931725				0.92874			0.918109				0.896683				0.863204				0.828154				0.801431
		0.926929				0.923664			0.912267				0.889712				0.856703				0.822789				0.79172
		0.922982				0.919514			0.907557				0.884258				0.851148				0.814747				0.779317
		0.918837				0.91521			0.902796				0.878981				0.844573				0.803441				0.766479
		0.913467				0.909651			0.896683				0.872234				0.835651				0.790521				0.756024
		0.906828				0.902734			0.888984				0.863527				0.824916				0.779067				0.749898
		0.900134				0.895685			0.880976				0.854189				0.814672				0.771822				0.748115
		0.895144				0.890343			0.874718				0.846636				0.80757				0.769532				0.74864
		0.892954				0.887895			0.871631				0.842706				0.804812				0.770412				0.74833
		0.89318				0.887995			0.871456				0.842315				0.805273				0.771125				0.744522
		0.894247				0.889027			0.872448				0.843522				0.806268				0.768827				0.736569
		0.894696				0.88944			0.872811				0.844102				0.80559				0.763178				0.726607
		0.894659				0.889301			0.872449				0.843633				0.803574				0.757218				0.719166
		0.896421				0.890926			0.873781				0.844626				0.80378				0.756523				0.719695
		0.903475				0.89795			0.880832				0.851691				0.811651				0.766898				0.732544
		0.91841				0.913154			0.896902				0.86897				0.831622				0.791584				0.759124
		0.940733				0.936183			0.922013				0.897131				0.864129				0.829209				0.796958
		0.965933				0.962519			0.95162				0.931664				0.904114				0.87344				0.839964
		0.986501				0.984464			0.977513				0.96361				0.941975				0.914552				0.879925
		0.994628				0.993894			0.990699				0.98263				0.966714				0.942402				0.908669
		0.98544				0.985599			0.985042				0.981126				0.97003				0.949689				0.920283
		0.959291				0.959711			0.960025				0.957539				0.949611				0.934345				0.912692
		0.92206				0.922074			0.921362				0.917349				0.91025				0.900225				0.888157
		0.883292				0.882396			0.879177				0.871313				0.862349				0.855911				0.852591
		0.852945				0.850932			0.844522				0.831723				0.81843				0.812114				0.813965
		0.838086				0.835063			0.825667				0.808231				0.789066				0.778583				0.780262
		0.840783				0.837087			0.825592				0.804884				0.779721				0.761517				0.757592
		0.857894				0.853949			0.841537				0.819375				0.789563				0.762231				0.748923
		0.882636				0.878806			0.866536				0.844548				0.812443				0.777336				0.753696
		0.907157				0.903651			0.892166				0.871333				0.839469				0.800225				0.768343
		0.925063				0.921906			0.911341				0.891862				0.862075				0.823239				0.787457
		0.933019				0.930101			0.920178				0.901625				0.874488				0.839826				0.805264
		0.931039				0.928191			0.918432				0.900089				0.874873				0.846057				0.816984
		0.921621				0.918687			0.908642				0.889847				0.864996				0.841176				0.819782
		0.908255				0.905145			0.894545				0.874922				0.848816				0.827191				0.813116
		0.894006				0.890699			0.879492				0.859003				0.830672				0.807784				0.798513
		0.880624				0.877148			0.865438				0.844281				0.81378				0.786973				0.778887
		0.868418				0.864809			0.852743				0.831172				0.79948				0.767955				0.757652
		0.856722				0.85299			0.840651				0.818814				0.787342				0.752421				0.737862
		0.844626				0.840748			0.8281				0.805961				0.775897				0.74045				0.721583
		0.831627				0.827553			0.814455				0.791816				0.7636				0.730903				0.709599
		0.817915				0.813593			0.799865				0.776469				0.749606				0.722091				0.701481
		0.804281				0.799677			0.785186				0.76084				0.73412				0.712484				0.695927
		0.791725				0.786844			0.771562				0.746235				0.718245				0.701226				0.691256
		0.78101				0.775893			0.759923				0.733765				0.70348				0.688343				0.68591
		0.772351				0.767063			0.7506				0.723902				0.691112				0.674633				0.678845
		0.765347				0.759955			0.743231				0.716324				0.681742				0.661326				0.669731
		0.759179				0.753733			0.736936				0.710092				0.675105				0.649653				0.658948
